1 **Defining Cardiac Cell Populations and Relative Cellular**  
2 **Composition of the Early Fetal Human Heart**

3  
4 **Jennifer M. Dewing<sup>1\*</sup>, Vinay Saunders<sup>1</sup>, Ita O’Kelly<sup>1,2</sup>, David I. Wilson<sup>1</sup>**

5 <sup>1</sup>Institute for Developmental Sciences, School of Human Development and Health, Faculty of  
6 Medicine, University of Southampton, Southampton, United Kingdom

8 <sup>2</sup>Immunocore Ltd, Abingdon, Oxford, United Kingdom

9 \*Corresponding Author

10 E-mail: [jmd2g08@soton.ac.uk](mailto:jmd2g08@soton.ac.uk)

11

12

13

14

15

16

17

18

19

20

21

## 22 ABSTRACT

23 The human heart is primarily composed of cardiomyocytes, fibroblasts, endothelial and smooth  
24 muscle cells. Reliable identification of fetal cardiac cell types using protein markers is important for  
25 understanding cardiac development and delineating the cellular composition of the human heart  
26 during early development, which remains largely unknown. The aim of this study was to use  
27 immunohistochemistry (IHC), flow cytometry and RT-PCR analyses to investigate the expression and  
28 specificity of commonly used cardiac cell markers in the early human fetal heart (8-12 post-conception  
29 weeks). The expression of previously reported protein markers for the detection of cardiomyocytes  
30 (Myosin Heavy Chain (MHC) and Troponin I (cTnI)), fibroblasts (DDR2, Thy1, Vimentin), endothelial  
31 cells (CD31) and smooth muscle cells ( $\alpha$ -SMA) were assessed. Flow cytometry revealed two distinct  
32 populations of cTnI expressing cells based on fluorescence intensity: cTnI<sup>High</sup> and cTnI<sup>Low</sup>. MHC positive  
33 cardiomyocytes were cTnI<sup>High</sup>, whereas MHC negative non-myocyte cells were cTnI<sup>Low</sup>. cTnI expression  
34 in non-myocytes was further confirmed by IHC and RT-PCR analyses, suggesting troponins are not  
35 cardiomyocyte-specific and may play distinct roles in non-muscle cells during early development.  
36 Vimentin was confirmed to be enriched in cultured fibroblast populations and flow cytometry revealed  
37 Vim<sup>High</sup> and Vim<sup>Low</sup> cell populations in the fetal heart. MHC positive cardiomyocytes were Vim<sup>Low</sup> whilst  
38 CD31 positive endothelial cells were Vim<sup>High</sup>. Based on the markers investigated, we estimate fetal  
39 human cardiomyocyte populations comprise 75-80% of total cardiac cells and exhibit the following  
40 marker profile:  $\alpha$ -MHC<sup>+</sup>/cTnI<sup>High</sup>/Vim<sup>Low</sup>. For the non-cardiomyocyte population, we estimate they  
41 comprise 20-25% of total cardiac cells and exhibit the following marker profile:  $\alpha$ -MHC  
42 /cTnI<sup>Low</sup>/Vim<sup>High</sup>. Our study suggests the marker profiles and proportions of fetal cardiac populations  
43 are distinct from that of the adult heart.

44

45

46

## 47 Introduction

48 The human heart is primarily composed of cardiomyocytes, fibroblasts, endothelial and smooth  
49 muscle cells. Rodent studies have proposed that cardiomyocytes occupy ~75% of normal adult  
50 myocardial volume and account for 30-40% of cell number, with non-cardiomyocytes (endothelial,  
51 smooth muscle cells and fibroblasts), though smaller in size, being the predominant cell type<sup>1-5</sup>.  
52 Similarly, immunohistochemical and flow cytometry analysis by Pinto *et al*<sup>4</sup> concluded that the adult  
53 human heart consists of approximately 30% cardiomyocytes and 50% endothelial cells. The relative  
54 cellular composition of the adult heart is likely to differ to that of the fetal heart during the dynamic  
55 stages of early development. The identification, characterisation and purification of cardiac cells relies  
56 upon their expression of cell-specific protein markers and is key to better understanding cardiac  
57 development and delineating the cellular composition of the human heart during early development,  
58 which remains largely unknown. Furthermore, given that pluripotent stem cell-derived  
59 cardiomyocytes (PSC-CMs) have been shown to be phenotypically similar to cardiomyocytes of the  
60 mid-gestation human fetal heart, an improved understanding of the protein marker profiles of these  
61 cells could aid the differentiation and purification of PSC-CMs in regenerative medicine<sup>6</sup>.

62 One of the key challenges to the isolation and identification of cell populations in both adult and fetal  
63 hearts is the heterogeneity of fibroblast cells and the lack of a defined cardiac fibroblast-specific  
64 marker. Fibroblasts are cells of mesenchymal origin that produce extracellular matrix proteins  
65 including collagen and fibronectin<sup>7</sup>. The cell surface collagen receptor DDR2 has previously been used  
66 as a marker of cardiac fibroblasts<sup>8-11</sup>, however, its expression has also been reported in rat endothelial  
67 and smooth muscle cells, although absent from cardiomyocytes<sup>2,10,12,13</sup>, raising the possibility of  
68 interspecies differences. The cytoskeletal intermediate filament vimentin is a commonly used  
69 fibroblast marker due to its high levels of expression in cells of mesenchymal origin. However,  
70 vimentin expression in endothelial and smooth muscle cells underscores this protein's lack of  
71 specificity<sup>14,15</sup>. Thy-1 (CD90), a cell-surface glycoprotein, has been shown to be expressed on cultured

72 cardiac fibroblasts and as a surface protein it has the advantage over vimentin and DDR2 in that it  
73 does not require cell permeabilisation and can therefore be used for fluorescent activated cell sorting  
74 (FACS) <sup>16-18</sup>. Thy-1 has been detected in cultured rat cardiac fibroblasts, with increased expression  
75 detected in fibrotic areas within the rat heart, suggesting it may be a marker for proliferating  
76 fibroblasts <sup>16</sup>. However, Thy-1 has also been detected in thymocytes, T-cells, neurons, hematopoietic  
77 stem cells and endothelial cells <sup>19-21</sup>. Whilst Pinto *et al.*, were able to use Thy-1 and Sca-1 to delineate  
78 cardiac fibroblasts in mice, neither of these markers were successful at isolating cardiac fibroblasts of  
79 the adult human heart<sup>4</sup>. Similarly, fibroblast-specific protein 1 (FSP1) has been shown to lack fibroblast  
80 specificity in cardiac tissue during remodelling, with expression identified in hematopoietic,  
81 endothelial and vascular smooth muscle cells <sup>22</sup>. Together, these studies suggest that many commonly  
82 used markers of fibroblasts lack specificity.

83 Endothelial and smooth muscle cells that line the cardiac vasculature can be detected by their  
84 expression of CD31 (PECAM-1) and  $\alpha$ -smooth muscle actin ( $\alpha$ -SMA), respectively. Commonly used  
85 markers of cardiomyocytes include the sarcomeric proteins cardiac troponin (subunits I, T and C),  
86 myosin and tropomyosin.  $\alpha$ -myosin heavy chain ( $\alpha$ -MHC) has high expression levels in cardiac muscle  
87 and significantly lower levels in skeletal muscle; subsequently the  $\alpha$ -MHC promoter is often used in  
88 transgenic mouse models to track cardiomyocytes <sup>18,23,24, 25</sup>. Whilst these markers may identify mature,  
89 differentiated endothelial, smooth muscle and cardiomyocyte cell populations in adult tissue, their  
90 specificity during development may be distinct.

91 The aim of this study was to use immunohistochemistry (IHC) and flow cytometry, alongside RT-PCR  
92 analysis to evaluate the specificity of a range of markers that hold the potential to specifically define  
93 cell populations in the early human fetal heart and use the novel marker profiles to estimate the  
94 cellular composition of the heart during early development.

95

96

## 97 **Materials and Methods**

### 98 **Isolation of Cardiac Cells**

99 Human fetal heart tissue (8 to 12 post conception weeks (pcw) was obtained from the Human  
100 Developmental Biology Resource (HDBR) Newcastle, UK. Tissue collection was in agreement with the  
101 Declaration of Helsinki (ethics approval reference: 08/HO906/21+5 NRES Committee North East-  
102 Newcastle & North Tyneside). Heart tissue was dissected to remove the aorta and pulmonary artery  
103 and the remaining ventricles and atria were divided into 1mm<sup>3</sup> pieces using a tissue chopper  
104 (Mcllwain) and mechanically dissociated together in 3ml of phosphate buffered saline (PBS) using the  
105 gentleMACS dissociator machine (Miltenyl Biotec) using the programme pre-set for heart tissue. The  
106 cell suspension was passed through a 70 µm nylon cell strainer (BD Biosciences). For analysis of cells  
107 from the aorta and pulmonary artery, the process was repeated with dissected aorta and pulmonary  
108 artery tissue.

### 109 **Fibroblast Isolation**

110 Fibroblasts were isolated from human fetal heart and skin tissue by explant migration following  
111 previously reported methods by Ieda *et al.*, (2010)<sup>18</sup>. Briefly, tissue was chopped into 1mm<sup>3</sup> pieces  
112 using a tissue chopper (Mcllwain) and cultured in 10% FBS DMEM on gelatin-coated plates for 1 to 2  
113 weeks to facilitate fibroblast migration. The fibroblasts cells were then isolated by addition of trypsin  
114 followed by filtering through a 70 µm filter to allow single fibroblast cells to pass through. The cellular  
115 filtrate was then pelleted by centrifugation at 1300 rpm for 3 minutes and re-plated.

### 116 **Flow Cytometry**

117 Dissociated and filtered cardiac cells were further filtered through a 35 µm cap into FACS tubes (BD  
118 Biosciences) to ensure a single cell suspension. Cells were treated with human FcR blocking serum (BD

119 Biosciences), fixed in 4% formaldehyde (Sigma) and permeabilized in 0.05% saponin (Sigma). Cells  
120 were incubated with primary and secondary antibodies and analysed using a BD FACSCanto I Flow  
121 cytometer (BD biosciences). Single, dual and triple stain flow cytometry analyses were carried out.  
122 Positive cells were gated based on their expression above isotype and no primary control samples.

## 123 **Immunohistochemistry and Immunocytochemistry**

124 Immunohistochemistry followed previously reported methods<sup>26</sup>. Briefly, human fetal heart tissue was  
125 fixed in 4% formaldehyde, embedded in paraffin and 5 µm microtome sections cut. Antigen retrieval  
126 was performed (15 minutes of boiling in 0.1mM sodium citrate) before primary and secondary  
127 antibody incubations and 4', 6-diamidino-2-phenylindole (DAPI) staining. For immunocytochemistry of  
128 cultured primary cardiac fibroblasts, cells were cultured on glass coverslips in 6-well plates and fixed  
129 in 4% formaldehyde. Cells were blocked with 3% BSA in PBS and treated with primary antibodies  
130 diluted in 0.1% triton overnight at 4 °C, followed by 1hr with secondary antibodies diluted in 0.1%  
131 triton.

132

## 133 **Antibodies for Flow Cytometry and Immunohistochemistry**

134 Antibodies were selected to identify cardiomyocytes, fibroblasts, smooth muscle cells and endothelial  
135 cells, based on current literature<sup>9,10,16,25,27</sup>. These included: Myosin Heavy chain (MHC) conjugated to  
136 efluor660 (50-6503-80 ebioscience), Troponin I (Ab47003, Abcam), DDR2 (Sc7555 Santa Cruz), Thy-1,  
137 (555595 BD Biosciences), Vimentin conjugated to Cy3 (C9080 Sigma), CD31 to APC (21270316  
138 Immunotools) and α-SMA conjugated to FITC (53-9760-80 ebioscience). Appropriate isotype control  
139 antibodies were used as negative controls for directly conjugated antibodies, and a no primary  
140 antibody control was used for non-conjugated antibodies.

141

142

## 143 **RT-PCR**

144 Total RNA was isolated using TRIzol Reagent (Invitrogen) from whole heart tissue and cell pellets of  
145 cultured primary fibroblasts. 1 µg of RNA was used for cDNA synthesis using M-MLV reverse  
146 transcriptase (Promega). Primer sequences and amplicon sizes are listed in supplementary table 1.  
147 Polymerase Chain Reaction (PCR) consisted of initial denaturation of DNA at 95 °C, followed by 40  
148 cycles of 94 °C for 1 minute, annealing at 58 °C for 1 minute and extension at 72 °C for 1 minute, with  
149 a final extension of 72 °C for 10 minutes.

150

### 151 **Supplementary Table 1. Primer sequences and amplicon sizes**

152 Primer sequences used for the detection of mRNA transcripts of key cell markers using RT-PCR.

153

## 154 **Results**

### 155 **Single marker immunohistochemistry and flow cytometry of the** 156 **fetal human heart**

157 Fetal human heart tissue was stained for markers of cardiomyocytes (MHC, TnI, TnT), cardiac  
158 fibroblasts (vimentin, DDR2, Thy-1), endothelial cells (CD31) and smooth muscle cells (α-SMA) (Figure  
159 1). TnI and α-MHC showed distinct sarcomeric staining typical of cardiomyocytes (Fig 1A). The  
160 fibroblast markers showed extensive staining throughout the heart tissue, with vimentin and Thy-1  
161 staining localised predominantly to the cytoplasm (Fig 1B). CD31 and α-SMA showed positive staining  
162 of the endothelial and smooth muscle cells lining the vessels in the heart, respectively (Fig 1C).

163

164

165 **Figure 1. Immunohistochemistry of fetal human heart tissue stained for cardiac cell markers.**

166 (A) Immunohistochemistry of cardiomyocyte markers TnI and  $\alpha$ -MHC. (B) Immunohistochemistry of  
167 fibroblast markers vimentin, Thy-1 and DDR2. (C) Immunohistochemistry of endothelial and smooth  
168 muscle markers, CD31 and  $\alpha$ -SMA, respectively. DAPI was used as a counter stain for cell nuclei.

169

170 Expression of these markers in dissociated cardiac cells, detected by flow cytometry, was used to  
171 inform on the proportions of the major cells types of the fetal human heart (Fig 2). For cardiomyocyte  
172 marker expression, 75% of cells were MHC<sup>+</sup> (n=21, SEM  $\pm$ 1.40) (Fig 2B) and 93% were TnI<sup>+</sup> (n=14, SEM  
173  $\pm$ 1.5) (Fig 2C). For cardiac fibroblast markers, 90% of cells were vimentin<sup>+</sup> (n=18, SEM  $\pm$ 1.2) (Fig 2D),  
174 83% were DDR2<sup>+</sup> (n=4, SEM  $\pm$ 0.6) (Fig 2E) and 81% were Thy-1<sup>+</sup> (n=15 SEM  $\pm$ 1.40) (Fig 2F). For  
175 endothelial and smooth muscle cell markers, 9% of cells were CD31<sup>+</sup> (n=12, SEM=  $\pm$ 0.54) (Fig 2G) and  
176 12% were  $\alpha$ -SMA<sup>+</sup> (n=7, SEM=  $\pm$  1.9) (Fig 2H), respectively.

177

178 **Figure 2. Representative flow cytometry histograms of fetal human heart cells stained for cardiac**  
179 **cell markers.**

180 (A) unstained heart cells, (B) MHC, (C) TnI, (D) Vimentin, (E) DDR2, (F) Thy-1, (G) CD31, (H)  $\alpha$ -SMA.  
181 Grey peaks in flow cytometry histograms represents isotype/negative controls. (I) Histogram showing  
182 the percentage of positive cardiac cells for each marker. Error bars represent standard deviation.

183

184 Flow cytometry dot plots for TnI and vimentin both revealed two distinct populations of positive cells  
185 based on their relative fluorescence intensity (Fig 3). On average, 11% of cells were Vim<sup>High</sup> (SEM  $\pm$ 1.01)  
186 and 78% were Vim<sup>Low</sup> (SEM  $\pm$ 0.54) (n=7) (Fig 3A and B). On average, 79% of cells were (TnI<sup>High</sup>) (SEM  
187  $\pm$ 2.41) and 19% were TnI<sup>Low</sup> (SEM  $\pm$ 2.1) (n=14) (Fig 3C and D). High and low expressing populations  
188 were also detected for troponin subunit T (TnT) (Supplementary Fig 1). Flow cytometry analysis of cells  
189 of the fetal aorta/pulmonary artery, which are absent of cardiomyocytes, expressed TnI at the same



190 fluorescence intensity as the TnI<sup>Low</sup> cardiac population, confirming this population contains non-  
191 cardiomyocyte cells types (Fig 3E).

192

193

194 **Figure 3. Vimentin and TnI exhibit high and low expressing populations in the human fetal heart.**

195 (A) Representative flow cytometry dot plot of vimentin expression in fetal cardiac cells. (B)

196 Representative flow cytometry histogram of vimentin expression in fetal cardiac cells. (C)

197 Representative flow cytometry dot plot of TnI expression in fetal cardiac cells. (B) Representative flow

198 cytometry histogram of TnI expression in fetal cardiac cells. (E) Representative flow cytometry

199 histogram of TnI expression in heart and aorta/pulmonary artery (AO/PA) tissue. Grey peaks in

200 histograms represent isotype controls.

201

202 **Supplementary Figure 1. TnT expression in fetal human heart cells**

203 Representative flow cytometry histogram of fetal human heart cells stained for TnT showing two

204 distinct populations of high and low TnT expression. Isotype control shown in grey

205

206 **Dual marker flow cytometry and immunohistochemistry of fetal**

207 **human heart**

208 To interrogate the cellular composition of the two TnI<sup>+</sup> populations, cardiac cells were co-stained with

209 TnI and MHC and analysed by dual flow cytometry. TnI<sup>High</sup> cells were also MHC<sup>+</sup> (80% of total cells,

210 SEM  $\pm$ 2.6) whilst TnI<sup>Low</sup> cells were MHC<sup>-</sup> (18% of total cells, SEM  $\pm$ 2.64) (n=5) (Fig 4A). To investigate

211 the identity of Vimentin<sup>+</sup> populations, cardiac cells were co-stained with vimentin and  $\alpha$ -SMA, CD31

212 or MHC. Vim<sup>High</sup> and Vim<sup>Low</sup> cells were then gated (Fig 4B) and plotted against these markers (Fig 4C-

213 F). The majority of Vim<sup>Low</sup> cells (blue) expressed TnI at higher levels, whilst Vim<sup>High</sup> cells (red) expressed

214 TnI at lower levels (Fig 4C). On average, 67% of cardiac cells were Vim<sup>Low</sup>/TnI<sup>High</sup> (SEM  $\pm$ 3.38) and 20%  
215 were Vim<sup>High</sup>/TnI<sup>Low</sup> (SEM  $\pm$ 2.53) (n=4). 18% of cells were  $\alpha$ -SMA<sup>+</sup>/Vim<sup>+</sup> (n=2, SEM  $\pm$ 6.37), with the  
216 majority of this population expressing vimentin at lower levels (Fig 4D). 9% of cells were CD31<sup>+</sup>/Vim<sup>+</sup>  
217 (n=8, SEM  $\pm$ 0.84), with the majority of these cells expressing high levels of vimentin (Fig 4E). 79% of  
218 cells were MHC<sup>+</sup>/Vim<sup>+</sup> (n=7, SEM  $\pm$ 1.88), with the majority of this population expressing low levels of  
219 vimentin (Fig 4F). Together, these data suggest that fetal cardiomyocytes and cardiac smooth muscle  
220 cells express vimentin at lower levels, whilst fetal cardiac endothelial cells express vimentin at higher  
221 levels.

222

#### 223 **Figure 4. Dual marker flow cytometry of vimentin in human fetal cardiac cell populations**

224 Dual flow cytometry dot plot of TnI and MHC. (B) Gating and colour coding of Vim<sup>High</sup> (red) and Vim<sup>Low</sup>  
225 (blue) positive cell populations. (C) TnI fluorescence intensity in Vim<sup>High</sup> and Vim<sup>Low</sup> cardiac populations.  
226 (D) Dual flow cytometry dot plots of vimentin with  $\alpha$ -SMA. (E) Dual flow cytometry dot plots of  
227 vimentin with CD31. (F) Dual flow cytometry dot plots of vimentin with MHC, populations. Flow  
228 cytometry gating based on isotype controls. FSC= forward scatter.

229

230 To confirm the flow cytometry data, dual immunohistochemistry was carried out on fetal human heart  
231 tissue. Co-expression of TnI and vimentin was seen in the myocardium and the cells of large blood  
232 vessels. However, the fluorescence intensity of TnI in the cells lining the blood vessel was much weaker  
233 relative to the myocardium, supporting the flow cytometry data that showed high TnI expression in  
234 myocytes and low TnI expression in non-myocytes (Fig 5A). Colocalisation of  $\alpha$ -SMA and vimentin was  
235 observed in coronary vessels (Fig 5B). Similarly, vimentin and CD31 co-stained the endothelial cells  
236 lining the cardiac blood vessels (Fig 5C). Co-localisation of vimentin with MHC in the myocardium  
237 supported the flow cytometry data that human fetal cardiomyocytes express vimentin (Fig 5D).

238 Expression of DDR2 co-localised with  $\alpha$ -MHC<sup>+</sup> cardiomyocytes and  $\alpha$ -MHC<sup>-</sup> cells of the  
239 aorta/pulmonary artery vessels (Supplementary Fig 2A). CD31<sup>+</sup> endothelial cells and  $\alpha$ -SMA<sup>+</sup> smooth  
240 muscle cells lining blood vessel also co-stained for DDR2 (Supplementary Fig 2B and C).

241

## 242 **Figure 5. Dual marker immunohistochemistry of vimentin in human fetal cardiac cell populations**

243 Dual immunohistochemistry of vimentin with (A) Tnl, (B)  $\alpha$ -SMA, (C) CD31 and (D) MHC. Asterisks  
244 denote blood vessel wall. Arrows identify sarcomeric structures.

245

## 246 **Supplementary Figure 2. Dual marker immunohistochemistry of DDR2 in human fetal cardiac cell** 247 **populations**

248 Dual immunohistochemistry of DDR2 with (A)  $\alpha$ -MHC, (B)  $\alpha$ -SMA and (C) CD31. Myo= myocardium.  
249 AO/PA= aorta/pulmonary artery.

250

## 251 **RT-PCR analysis of cardiac cell marker gene expression**

252 To investigate the expression of cardiac cell markers in myocyte and non-myocyte populations, RT-  
253 PCR was performed to detect marker transcripts in fetal heart and primary fetal fibroblasts isolated  
254 from fetal human ventricular heart tissue, as previously described<sup>18</sup>. Fetal heart tissue expressed *VIM*  
255 (*Vimentin*), *MYH6* ( $\alpha$ -MHC), *TNNI3* (*cTnl*), *TNNT2* (*cTnT*), *PECAM-1* (*CD31*) and  $\alpha$ -SMA (Fig 6A). Cardiac  
256 fibroblasts were enriched for *VIM* and  $\alpha$ -SMA (Fig 6B). *TNNI3* and *TNNT2* transcripts were also  
257 detected in cardiac fibroblasts, confirming the expression of these markers in non-myocyte  
258 populations.  $\alpha$ -MHC mRNA expression was not detected in cardiac fibroblasts, confirming that  
259 expression of *TNNI3* and *TNNT2* was not due to cardiomyocyte contamination. The absence of *CD31*  
260 mRNA expression also confirmed that the isolated fibroblasts were absent of endothelial cells.

261 **Figure 6. Gene expression analysis of cardiac markers in human fetal heart and ventricular**  
262 **fibroblasts.**

263 (A) RT-PCR gene expression analysis of previously described cell markers in fetal human heart. (B) RT-  
264 PCR gene expression analysis of cell markers in isolated fetal human cardiac fibroblasts. Non-  
265 contiguous gel lanes are demarcated by vertical white lines.

266

267 **Marker protein expression in fetal ventricular fibroblasts**

268 Cultured ventricular fibroblasts were stained for Vimentin, TnI and  $\alpha$ -SMA and analysed by flow  
269 cytometry and immunocytochemistry. All three proteins were enriched in ventricular fibroblasts  
270 (>96% positive) (Fig 7). This data further supports the expression of TnI in non-myocyte cells of the  
271 fetal heart. Interestingly, the staining pattern of TnI in these cells is distinct from that observed in  
272 mature cardiomyocytes, with a lack of sarcomeric organisation.

273

274 **Figure 7. Marker protein expression in fetal ventricular fibroblasts.**

275 Representative flow cytometry and immunocytochemistry analyses of (A) vimentin (B) Thy-1 (C), DDR2  
276 (D), TnI and (E)  $\alpha$ -SMA Primary cultures fetal ventricular fibroblasts (n=3). Isotype controls in grey.

277

278 **Discussion**

279 This study aimed to investigate the expression and specificity of commonly used cardiac cell markers  
280 in the early developing human heart. Immunohistochemical analyses of the cardiomyocyte markers  
281  $\alpha$ -MHC and cTnI showed defined sarcomeric staining in the myocardium of fetal heart tissue  
282 confirming their expression in cardiomyocytes. However, flow cytometry analyses showed a greater

283 percentage of cardiac cells expressing cTnI (93%) compared to  $\alpha$ -MHC (79%), suggesting cells other  
284 than cardiomyocytes may be expressing cTnI. Flow cytometry, immunocytochemistry and RT-PCR  
285 analyses were able to confirm the expression of cTnI at lower levels in non-myocytes and higher levels  
286 in cardiomyocytes. This is supported by recent findings from Cui *et al.*,<sup>28</sup> identifying positive  
287 immunostaining of troponin T in cardiac fibroblasts from 17 gestational week fetal cardiac tissue.  
288 Furthermore, previous studies have shown the expression of other contractile proteins, including  
289 actin, myosin and tropomyosin, in non-muscle cells, which suggests that cardiac troponin may also  
290 have non-muscle-specific isoforms<sup>29-31</sup>. In this study, the non-striated pattern of cTnI expression in  
291 cardiac fibroblasts confirmed a lack of sarcomeric organisation, suggesting a role of troponins in non-  
292 muscle cells distinct from that of cardiomyocytes and skeletal muscle cells. As such, this data suggests  
293 troponin proteins are not specific markers of cardiomyocytes in the developing human heart.

294 The mesenchymal marker vimentin is a commonly used fibroblast marker; however, we showed  
295 approximately 90% of fetal cardiac cells are positive for vimentin. We confirmed that endothelial cells  
296 express high levels of vimentin, as previously described<sup>15</sup>. Whilst our data confirmed the enrichment  
297 of vimentin in cultured cardiac fibroblasts, flow cytometry analysis of fetal heart cells showed  
298 expression of vimentin at low levels in  $\alpha$ -MHC<sup>+</sup> cardiomyocytes, with 79% of cardiac cells having  $\alpha$ -  
299 MHC<sup>+</sup>/Vim<sup>Low</sup> marker profile. This is consistent with a previous study that identified weak expression  
300 of vimentin in some cardiomyocytes of 9-14 pcw human hearts and demonstrated that with increasing  
301 fetal age vimentin expression in cardiomyocytes decreases and desmin expression increases<sup>32</sup>. The  
302 lack of data identifying vimentin expression in adult cardiomyocytes further suggests that vimentin  
303 expression may be a property of cardiomyocytes of the developing heart only. The collagen receptor  
304 DDR2 has been identified as a more specific marker of cardiac fibroblasts<sup>33</sup>, however, our results  
305 confirmed its expression in cardiomyocytes, endothelial cells and smooth muscle cells of the  
306 developing heart.

307 Together, our results offer an estimate of the relative cellular composition of the human fetal heart.  
308 We consider the marker profile ' $\alpha$ -MHC<sup>+</sup>/cTnI<sup>High</sup>/Vim<sup>Low</sup>' to represent the fetal human cardiomyocyte  
309 population, which we estimate to comprise 75-80% of total cardiac cells. The non-cardiomyocyte  
310 population (primarily composed of fibroblasts, smooth muscle cells and endothelial cells) comprises  
311 20-25% of total cardiac cells and exhibit an  $\alpha$ -MHC<sup>-</sup>/cTnI<sup>Low</sup>/Vim<sup>High</sup> marker profile, of which  
312 approximately 10% are endothelial cells (CD31<sup>+</sup>/Vim<sup>High</sup>). Due to the lack of a fibroblast-specific  
313 marker, it is difficult to accurately determine the percentage of fibroblasts and smooth muscle cells,  
314 although it is likely in the region of 5-15%. Of note, we found 11% of cells were Vim<sup>+</sup>/ $\alpha$ -SMA<sup>+</sup> which  
315 may represent the combined fibroblast and smooth muscle cell population or in fact a myofibroblast  
316 population. The common lineage of smooth muscle cells and fibroblasts predicts that during early fetal  
317 development, discrimination between these cell types may be difficult if the phenotypes have yet to  
318 become distinct <sup>28,34</sup>.

319 These results indicate a fetal cellular composition distinct from that of the adult heart, which has been  
320 estimated to be comprised of 30-40% cardiomyocytes, despite the cells occupying three quarters of  
321 normal myocardial volume. Our results suggest that in the early developing heart, cardiomyocytes are  
322 the predominant cell type, comprising around 75% of total cells. This figure is likely reflective of the  
323 proliferative nature of fetal cardiomyocytes relative to adult cardiomyocytes. Mitosis of differentiated  
324 cardiomyocytes in the developing heart is well documented and is responsible for cardiac  
325 morphogenesis and organogenesis in utero<sup>35</sup>, however, from two weeks after birth, cardiomyocyte  
326 proliferation is significantly reduced in the mammalian heart as these cells enter cell cycle arrest, with  
327 continued cardiac growth reliant of hypertrophy of pre-existing cardiomyocytes <sup>36,37</sup>.

328 The results from our study suggest the marker profiles of fetal cardiac cells are distinct from that of  
329 adult cells. The phenotypic similarities between the mid-gestation human fetal heart and pluripotent  
330 stem cell-derived cardiomyocytes suggests our data could be useful when purifying and characterising  
331 these cells. Furthermore, the marker profiles identified could potentially be used for further studies

332 to determine how the ratio of cardiomyocytes to non-cardiomyocytes changes throughout fetal  
333 development.

334

## 335 Acknowledgments

336 This work was funded by the MRC DTA Capacity Building Studentship G1000406. The human  
337 embryonic and fetal material was provided by the Joint MRC/Wellcome Trust grant #099175/Z/12/Z  
338 Human Developmental Biology Resource (HDBR)

339

- 340 1 Vliegen, H. W., Laarsem A. V.D, Cornelisse, C.J. Eulderink, F. Myocardial changes in pressure  
341 overload-induced left ventricular hypertrophy. A study on tissue composition,  
342 polyploidization and multinucleation. *European Heart Journal* **12**, 488-494 (1991).
- 343 2 Camelliti, P., Borg, T. K. & Kohl, P. Structural and functional characterisation of cardiac  
344 fibroblasts. *Cardiovascular research* **65**, 40-51, doi:10.1016/j.cardiores.2004.08.020 (2005).
- 345 3 Moore, G. W., Hutchins, G. M., Bulkley, B. H., Tseng, J. S. & Ki, P. F. Constituents of the  
346 human ventricular myocardium: connective tissue hyperplasia accompanying muscular  
347 hypertrophy. *Am Heart J* **100**, 610-616 (1980).
- 348 4 Pinto, A. R. *et al.* Revisiting Cardiac Cellular Composition. *Circulation research* **118**, 400-409,  
349 doi:10.1161/CIRCRESAHA.115.307778 (2016).
- 350 5 Zhou, P. & Pu, W. T. Recounting Cardiac Cellular Composition. *Circ Res* **118**, 368-370,  
351 doi:10.1161/CIRCRESAHA.116.308139 (2016).
- 352 6 Denning, C. *et al.* Cardiomyocytes from human pluripotent stem cells: From laboratory  
353 curiosity to industrial biomedical platform. *Biochimica et biophysica acta*,  
354 doi:10.1016/j.bbamcr.2015.10.014 (2015).
- 355 7 Souders, C. A., Bowers, S. L. & Baudino, T. A. Cardiac fibroblast: the renaissance cell.  
356 *Circulation research* **105**, 1164-1176, doi:10.1161/CIRCRESAHA.109.209809 (2009).
- 357 8 Ponten, A. *et al.* FACS-based isolation, propagation and characterization of mouse  
358 embryonic cardiomyocytes based on VCAM-1 surface marker expression. *PloS one* **8**,  
359 e82403, doi:10.1371/journal.pone.0082403 (2013).
- 360 9 Banerjee, I., Fuseler, J. W., Price, R. L., Borg, T. K. & Baudino, T. A. Determination of cell types  
361 and numbers during cardiac development in the neonatal and adult rat and mouse. *Am J*  
362 *Cardiovasc Dis* **293**, H1883-H1891, doi:10.1152/ajpheart.00514.2007.-Cardiac (2007).
- 363 10 Goldsmith, E. C., Zhang, X., Watson, J., Hastings, J. & Potts, J. D. The collagen receptor DDR2  
364 is expressed during early cardiac development. *Anat Rec (Hoboken)* **293**, 762-769,  
365 doi:10.1002/ar.20922 (2010).
- 366 11 Goldsmith, E. C. *et al.* Organization of fibroblasts in the heart. *Developmental Dynamics* **230**,  
367 787-794, doi:10.1002/dvdy.20095 (2004).
- 368 12 Shyu, K. G., Chao, Y. M., Wang, B. W. & Kuan, P. Regulation of discoidin domain receptor 2  
369 by cyclic mechanical stretch in cultured rat vascular smooth muscle cells. *Hypertension* **46**,  
370 614-621, doi:10.1161/01.HYP.0000175811.79863.e2 (2005).

- 371 13 Morales, M. O., Price, R. L. & Goldsmith, E. C. Expression of Discoidin Domain Receptor 2  
372 (DDR2) in the developing heart. *Microscopy and microanalysis : the official journal of*  
373 *Microscopy Society of America, Microbeam Analysis Society, Microscopical Society of Canada*  
374 **11**, 260-267, doi:10.1017/S1431927605050518 (2005).
- 375 14 Wang, R., Li, Q. & Tang, D. D. Role of vimentin in smooth muscle force development. *Am J*  
376 *Physiol Cell Physiol* **291**, C483-C489 (2011).
- 377 15 Dave, J. M. & Bayless, K. J. Vimentin as an integral regulator of cell adhesion and endothelial  
378 sprouting. *Microcirculation* **21**, 333-344, doi:10.1111/micc.12111 (2014).
- 379 16 Hudon-David, F., Bouzeghrane, F., Couture, P. & Thibault, G. Thy-1 expression by cardiac  
380 fibroblasts: lack of association with myofibroblast contractile markers. *Journal of molecular*  
381 *and cellular cardiology* **42**, 991-1000, doi:10.1016/j.yjmcc.2007.02.009 (2007).
- 382 17 Baum, J. & Duffy, H. S. Fibroblasts and myofibroblasts: what are we talking about? *Journal of*  
383 *cardiovascular pharmacology* **57**, 376-379, doi:10.1097/FJC.0b013e3182116e39 (2011).
- 384 18 Ieda, M. *et al.* Direct reprogramming of fibroblasts into functional cardiomyocytes by  
385 defined factors. *Cell* **142**, 375-386, doi:10.1016/j.cell.2010.07.002 (2010).
- 386 19 Rege, T. A. & Hagoood, J. S. Thy-1 as a regulator of cell-cell and cell-matrix interactions in axon  
387 regeneration, apoptosis, adhesion, migration, cancer, and fibrosis. *FASEB journal : official*  
388 *publication of the Federation of American Societies for Experimental Biology* **20**, 1045-1054,  
389 doi:10.1096/fj.05-5460rev (2006).
- 390 20 Craig, W., Kay, R., Cutler, R. L. & Lansdorp, P. M. Expression of Thy-1 on human  
391 hematopoietic progenitor cells. *J. Exp. Med.* **177**, 1331-1342 (1993).
- 392 21 Wetzel, A. *et al.* Human Thy-1 (CD90) on Activated Endothelial Cells Is a Counterreceptor for  
393 the Leukocyte Integrin Mac-1 (CD11b/CD18). *The Journal of Immunology* **172**, 3850-3859,  
394 doi:10.4049/jimmunol.172.6.3850 (2004).
- 395 22 Kong, P., Christia, P., Saxena, A., Su, Y. & Frangogiannis, N. G. Lack of specificity of fibroblast-  
396 specific protein 1 in cardiac remodeling and fibrosis. *American journal of physiology. Heart*  
397 *and circulatory physiology* **305**, H1363-1372, doi:10.1152/ajpheart.00395.2013 (2013).
- 398 23 Protze, S. *et al.* A new approach to transcription factor screening for reprogramming of  
399 fibroblasts to cardiomyocyte-like cells. *Journal of molecular and cellular cardiology* **53**, 323-  
400 332, doi:10.1016/j.yjmcc.2012.04.010 (2012).
- 401 24 Qian, L., Berry, E. C., Fu, J. D., Ieda, M. & Srivastava, D. Reprogramming of mouse fibroblasts  
402 into cardiomyocyte-like cells in vitro. *Nature protocols* **8**, 1204-1215,  
403 doi:10.1038/nprot.2013.067 (2013).
- 404 25 Molkenin, J. D., Jobe, S. M. & Markham, B. E.  $\alpha$ -myosin heavy chain gene regulation:  
405 delineation and characterization of the cardiac muscle-specific enhancer and muscle-specific  
406 promoter. *Journal of molecular and cellular cardiology* **28**, 1211-1225 (1996).
- 407 26 Saunders, V., Dewing, J. M., Sanchez-Elsner, T. & Wilson, D. I. Expression and localisation of  
408 thymosin beta-4 in the developing human early fetal heart. *PLOS ONE* **13**, e0207248,  
409 doi:10.1371/journal.pone.0207248 (2018).
- 410 27 Baudino, T. A., Carver, W., Giles, W. & Borg, T. K. Cardiac fibroblasts: friend or foe? *American*  
411 *journal of physiology. Heart and circulatory physiology* **291**, H1015-1026,  
412 doi:10.1152/ajpheart.00023.2006 (2006).
- 413 28 Cui, Y. *et al.* Single-Cell Transcriptome Analysis Maps the Developmental Track of the Human  
414 Heart. *Cell Rep* **26**, 1934-1950 e1935, doi:10.1016/j.celrep.2019.01.079 (2019).
- 415 29 Ju, Y. *et al.* Troponin T3 expression in skeletal and smooth muscle is required for growth and  
416 postnatal survival: characterization of Tnnt3(tm2a(KOMP)Wtsi) mice. *Genesis* **51**, 667-675,  
417 doi:10.1002/dvg.22407 (2013).
- 418 30 Kajioka, S. *et al.* Endogenous cardiac troponin T modulates Ca<sup>2+</sup>-mediated smooth muscle  
419 contraction. *Scientific reports* **2**, 979, doi:10.1038/srep00979 (2012).



- 420 31 Gahlmann, R., Wade, R., Gunning, P. & Kedes, L. Differential expression of slow and fast  
421 skeletal muscle troponin C: Slow skeletal muscle troponin C is expressed in human  
422 fibroblasts. *Journal of Molecular Biology* **201**, 379-391 (1988).
- 423 32 Kim, H. D. Expression of intermediate filament Desmin and Vimentin in the human fetal  
424 heart. *Anat Rec* **246**, 271-278 (1996).
- 425 33 Tarbit, E., Singh, I., Peart, J. N. & Rose'Meyer, R. B. Biomarkers for the identification of  
426 cardiac fibroblast and myofibroblast cells. *Heart Fail Rev* **24**, 1-15, doi:10.1007/s10741-018-  
427 9720-1 (2019).
- 428 34 Rinkevich, Y. *et al.* Identification and prospective isolation of a mesothelial precursor lineage  
429 giving rise to smooth muscle cells and fibroblasts for mammalian internal organs, and their  
430 vasculature. *Nature Cell Biology* **14**, 1251–1260 (2012).
- 431 35 Yutzey, K. E. Cardiomyocyte Proliferation: Teaching an Old Dogma New Tricks. *Circ Res* **120**,  
432 627-629, doi:10.1161/CIRCRESAHA.116.310058 (2017).
- 433 36 Leri, A., Rota, M., Pasqualini, F. S., Goichberg, P. & Anversa, P. Origin of cardiomyocytes in  
434 the adult heart. *Circulation research* **116**, 150-166, doi:10.1161/CIRCRESAHA.116.303595  
435 (2015).
- 436 37 Kikuchi, K. & Poss, K. D. Cardiac regenerative capacity and mechanisms. *Annual review of cell*  
437 *and developmental biology* **28**, 719-741, doi:10.1146/annurev-cellbio-101011-155739  
438 (2012).
- 439

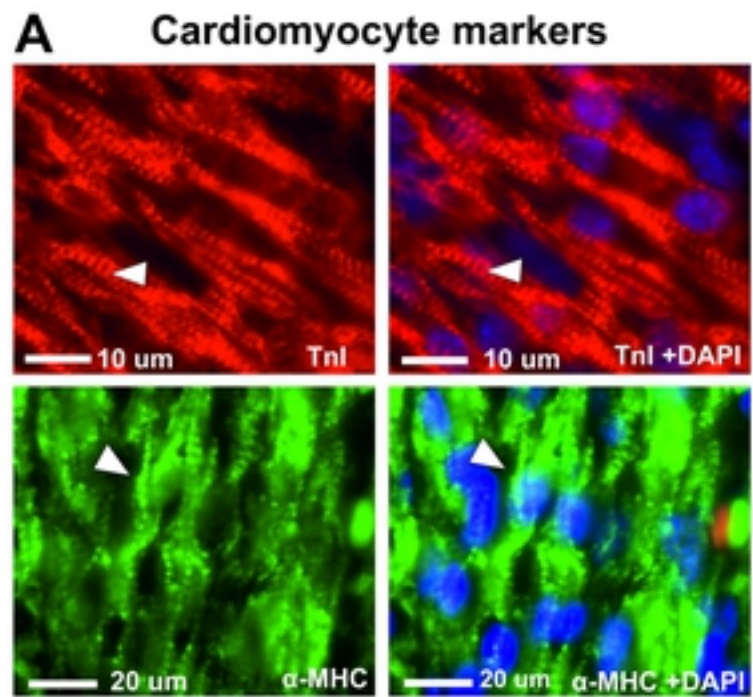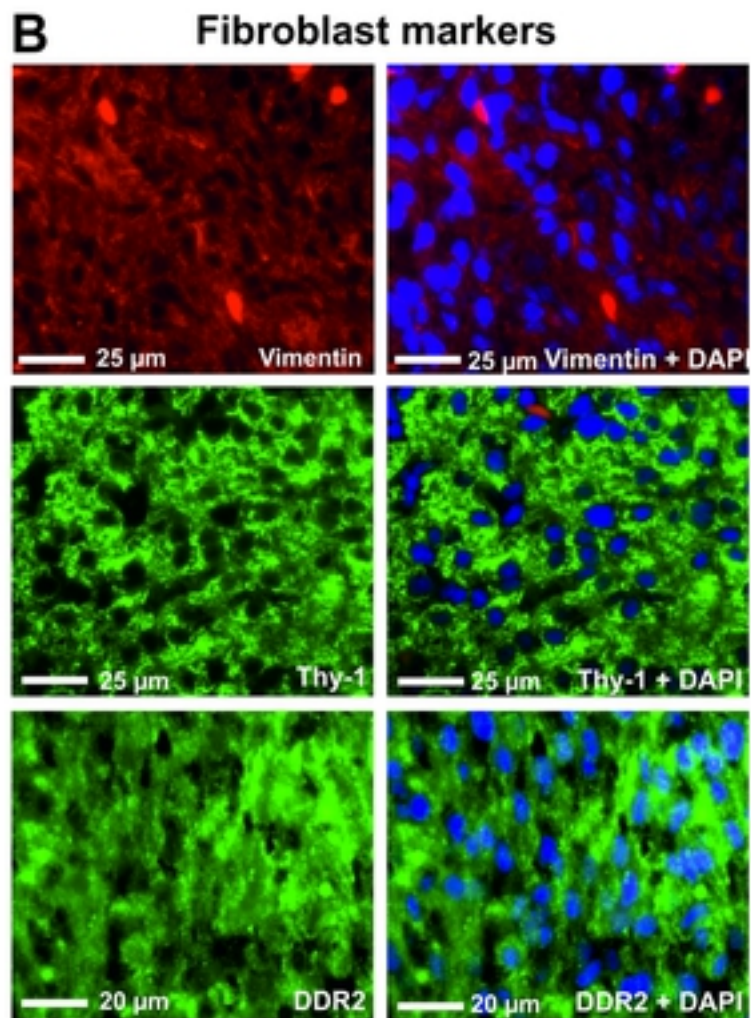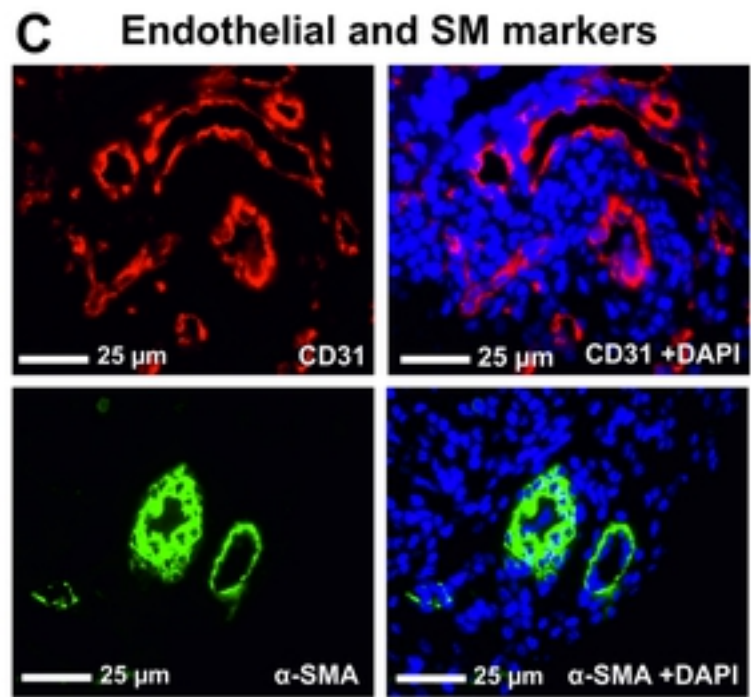

Figure 1

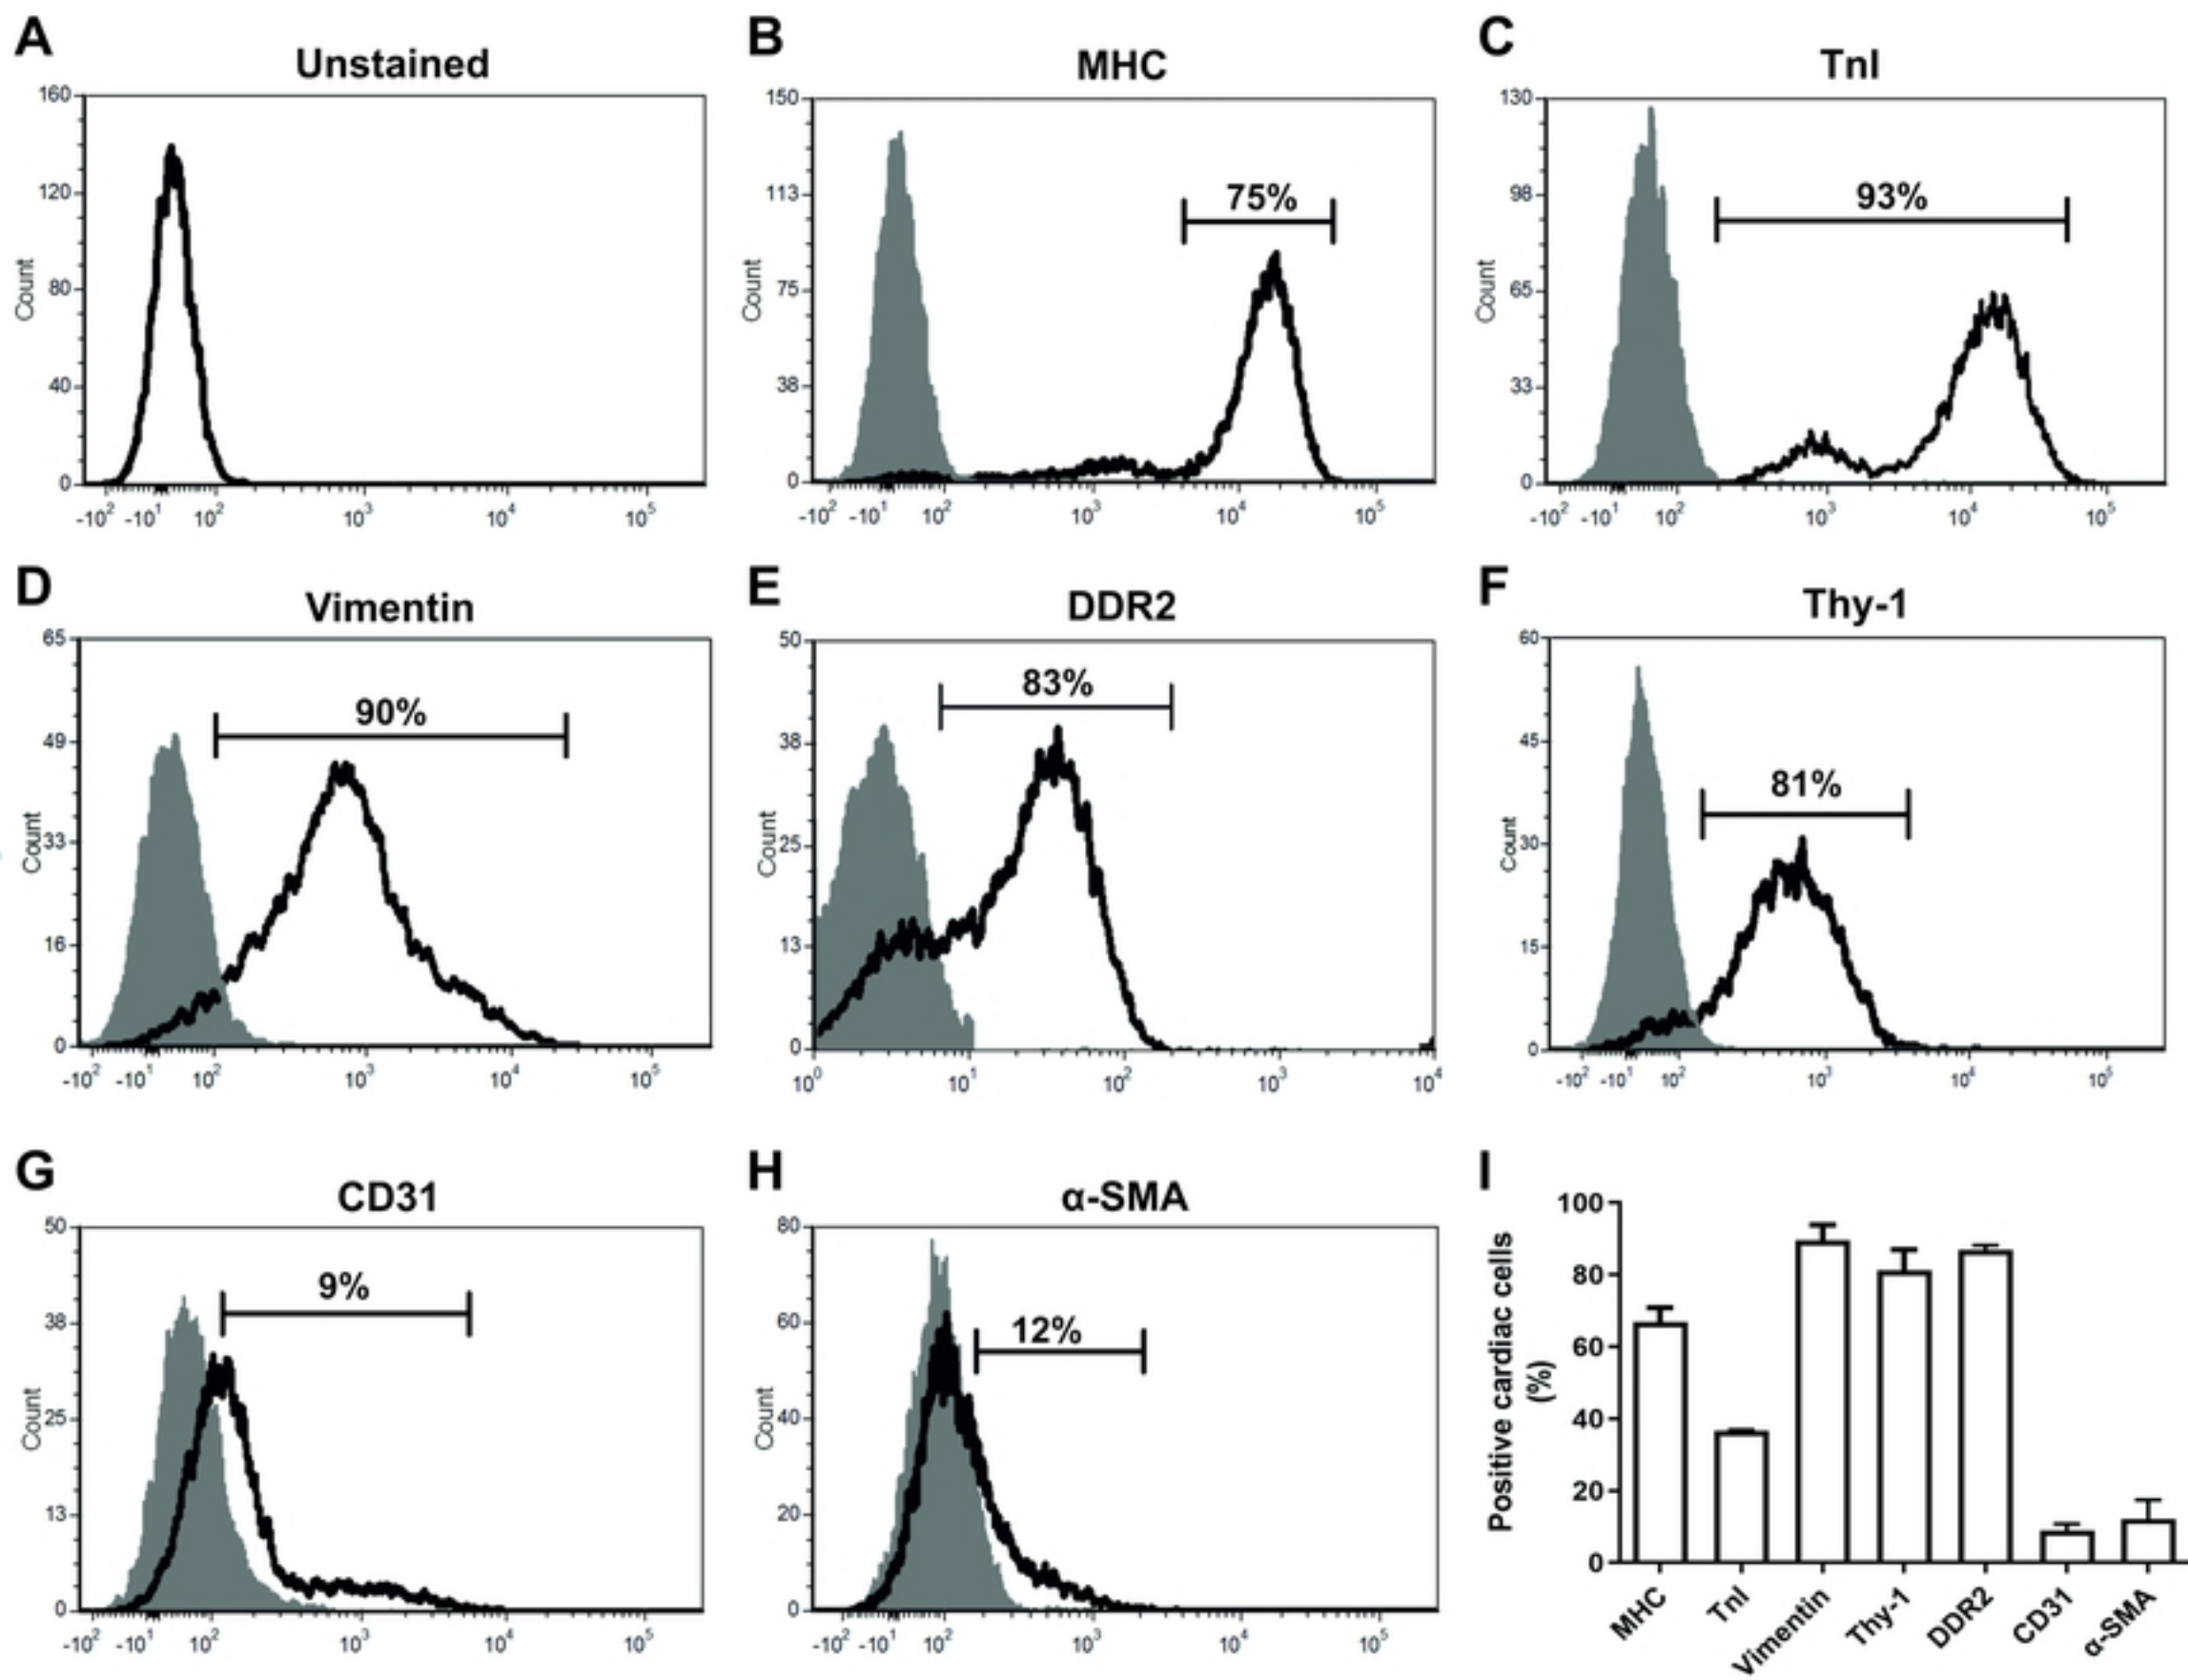

Figure 2

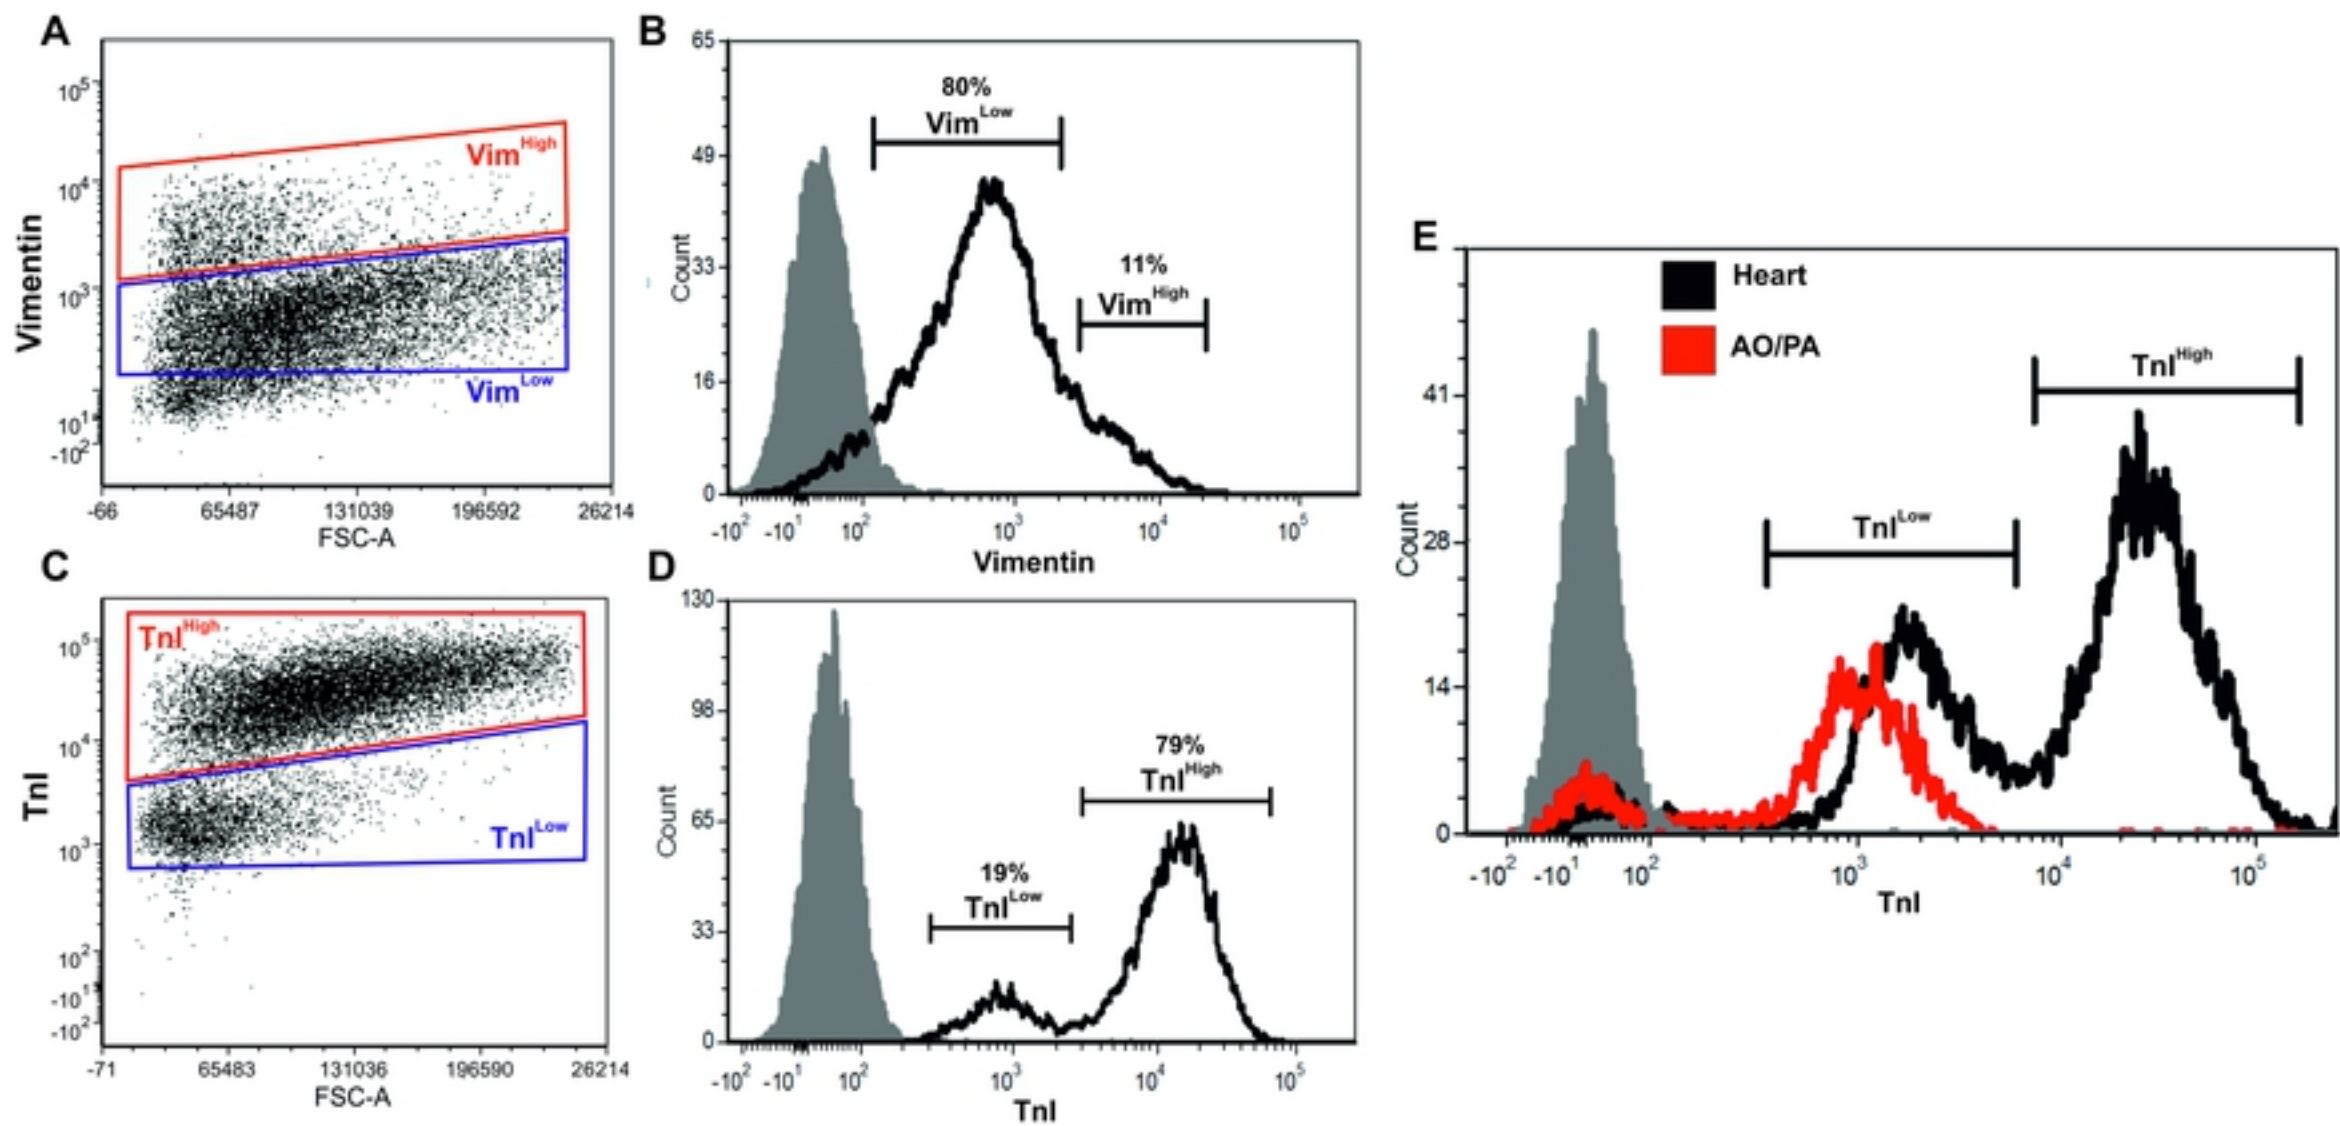

Figure 3



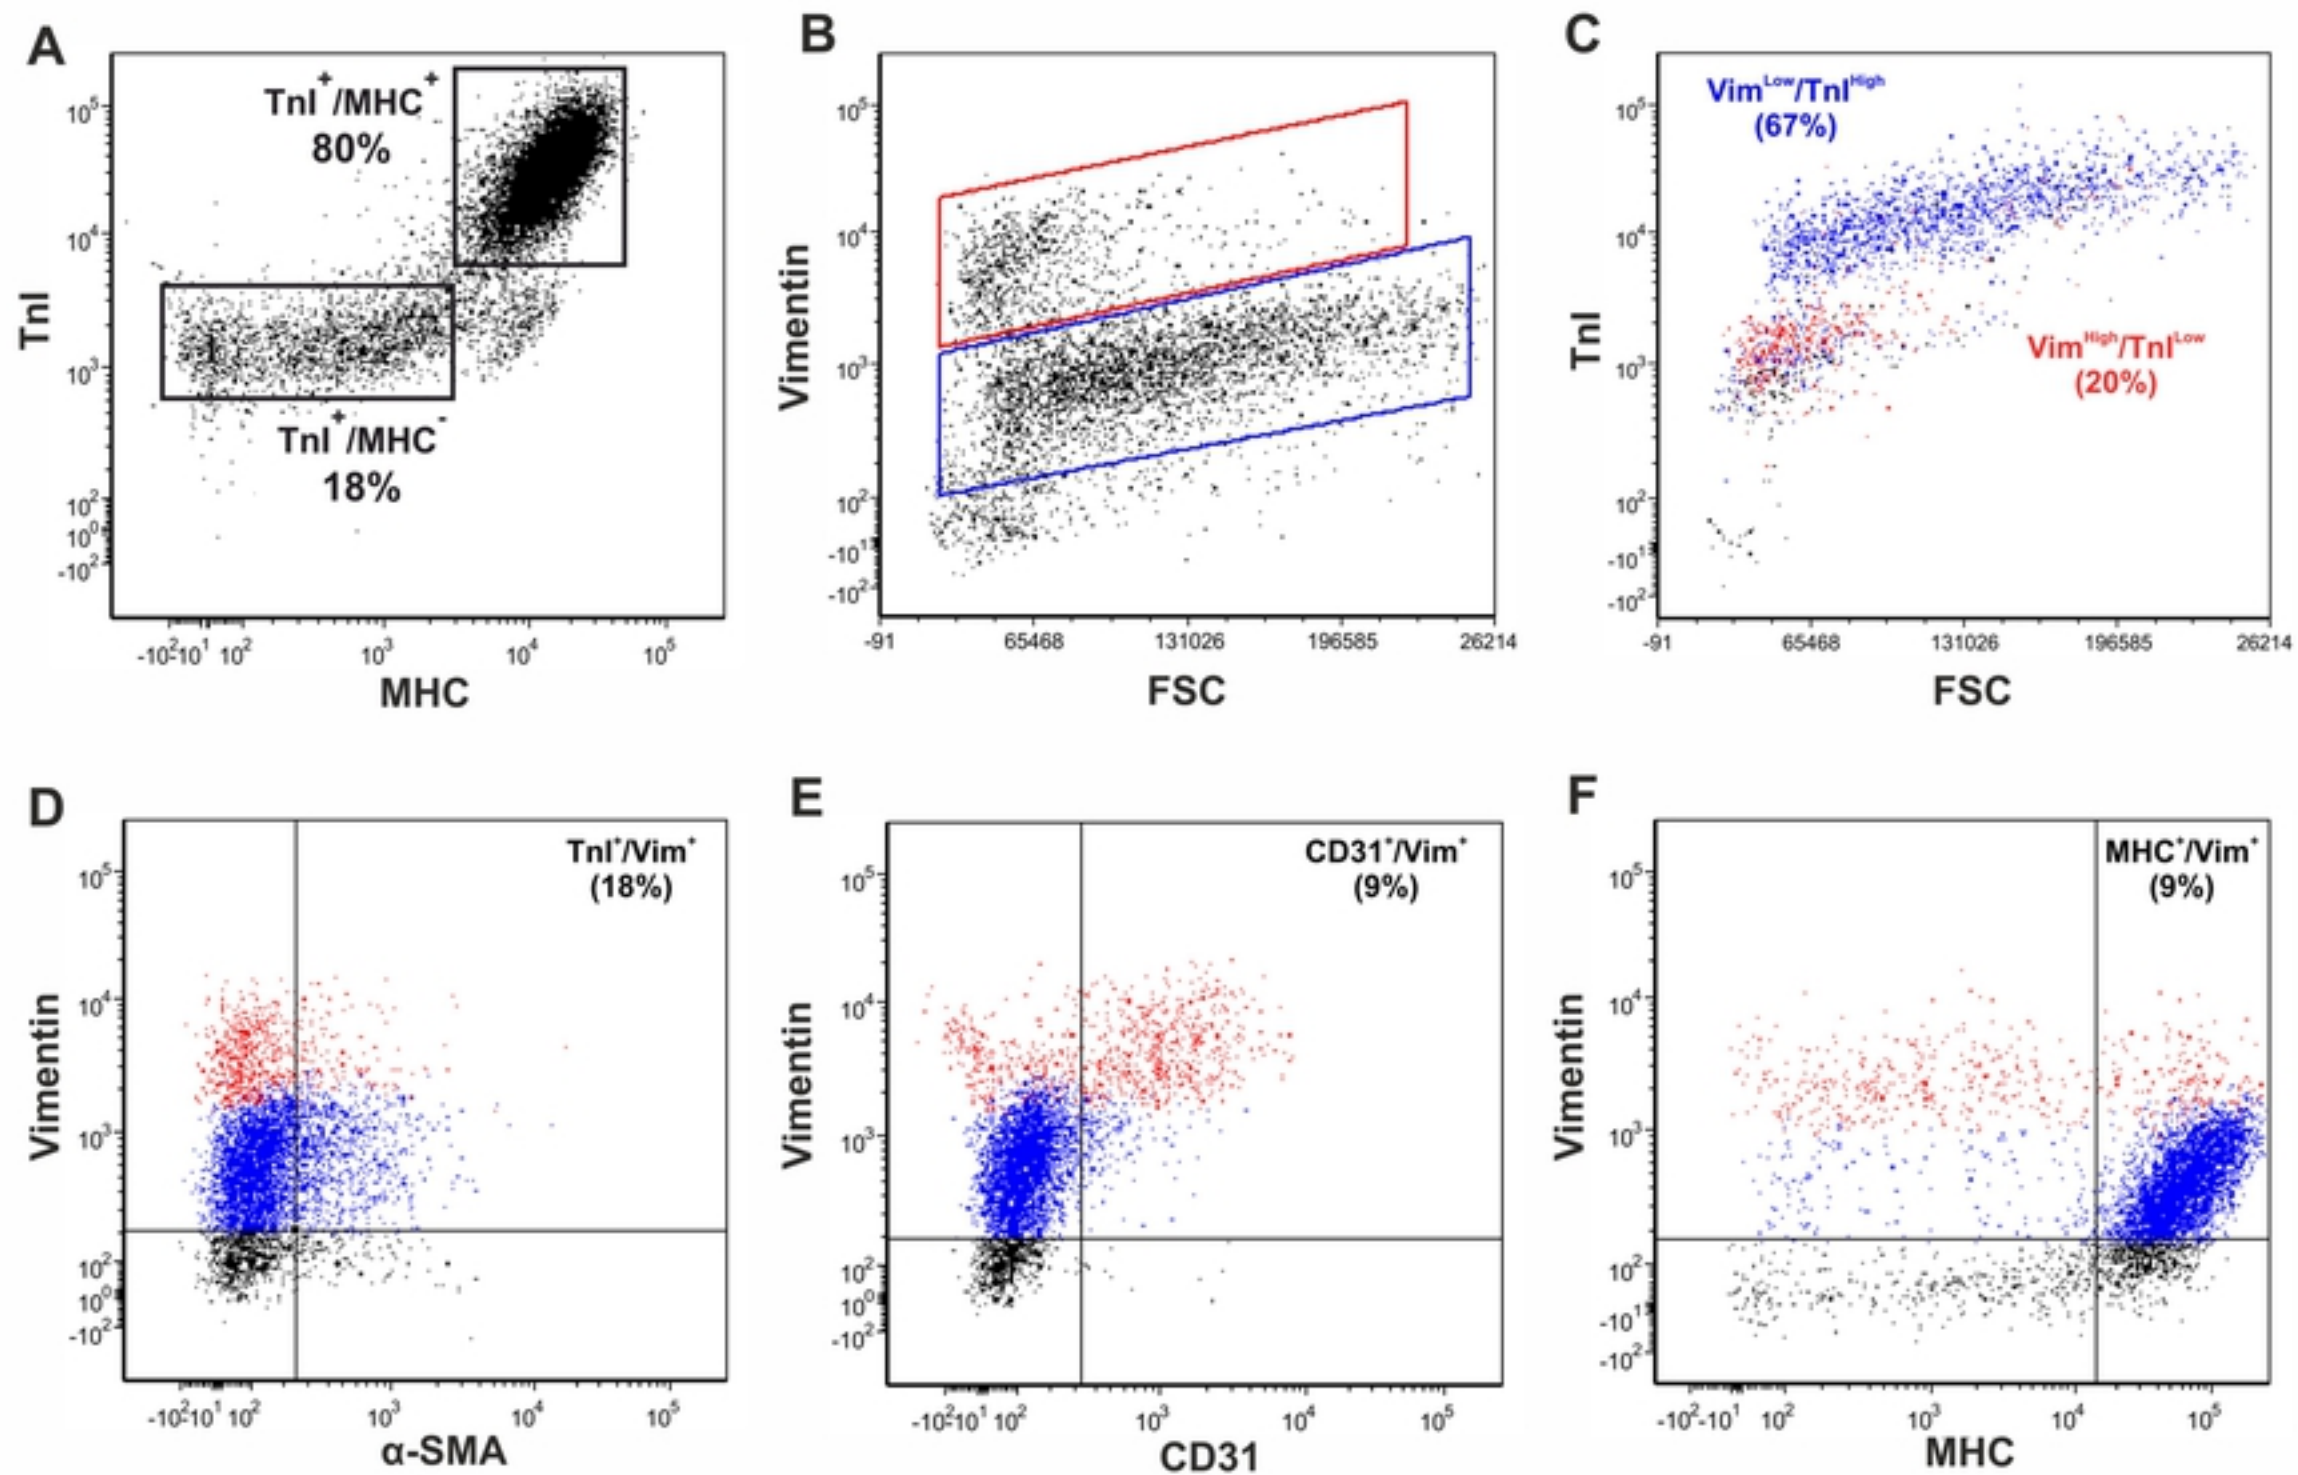

Figure 4



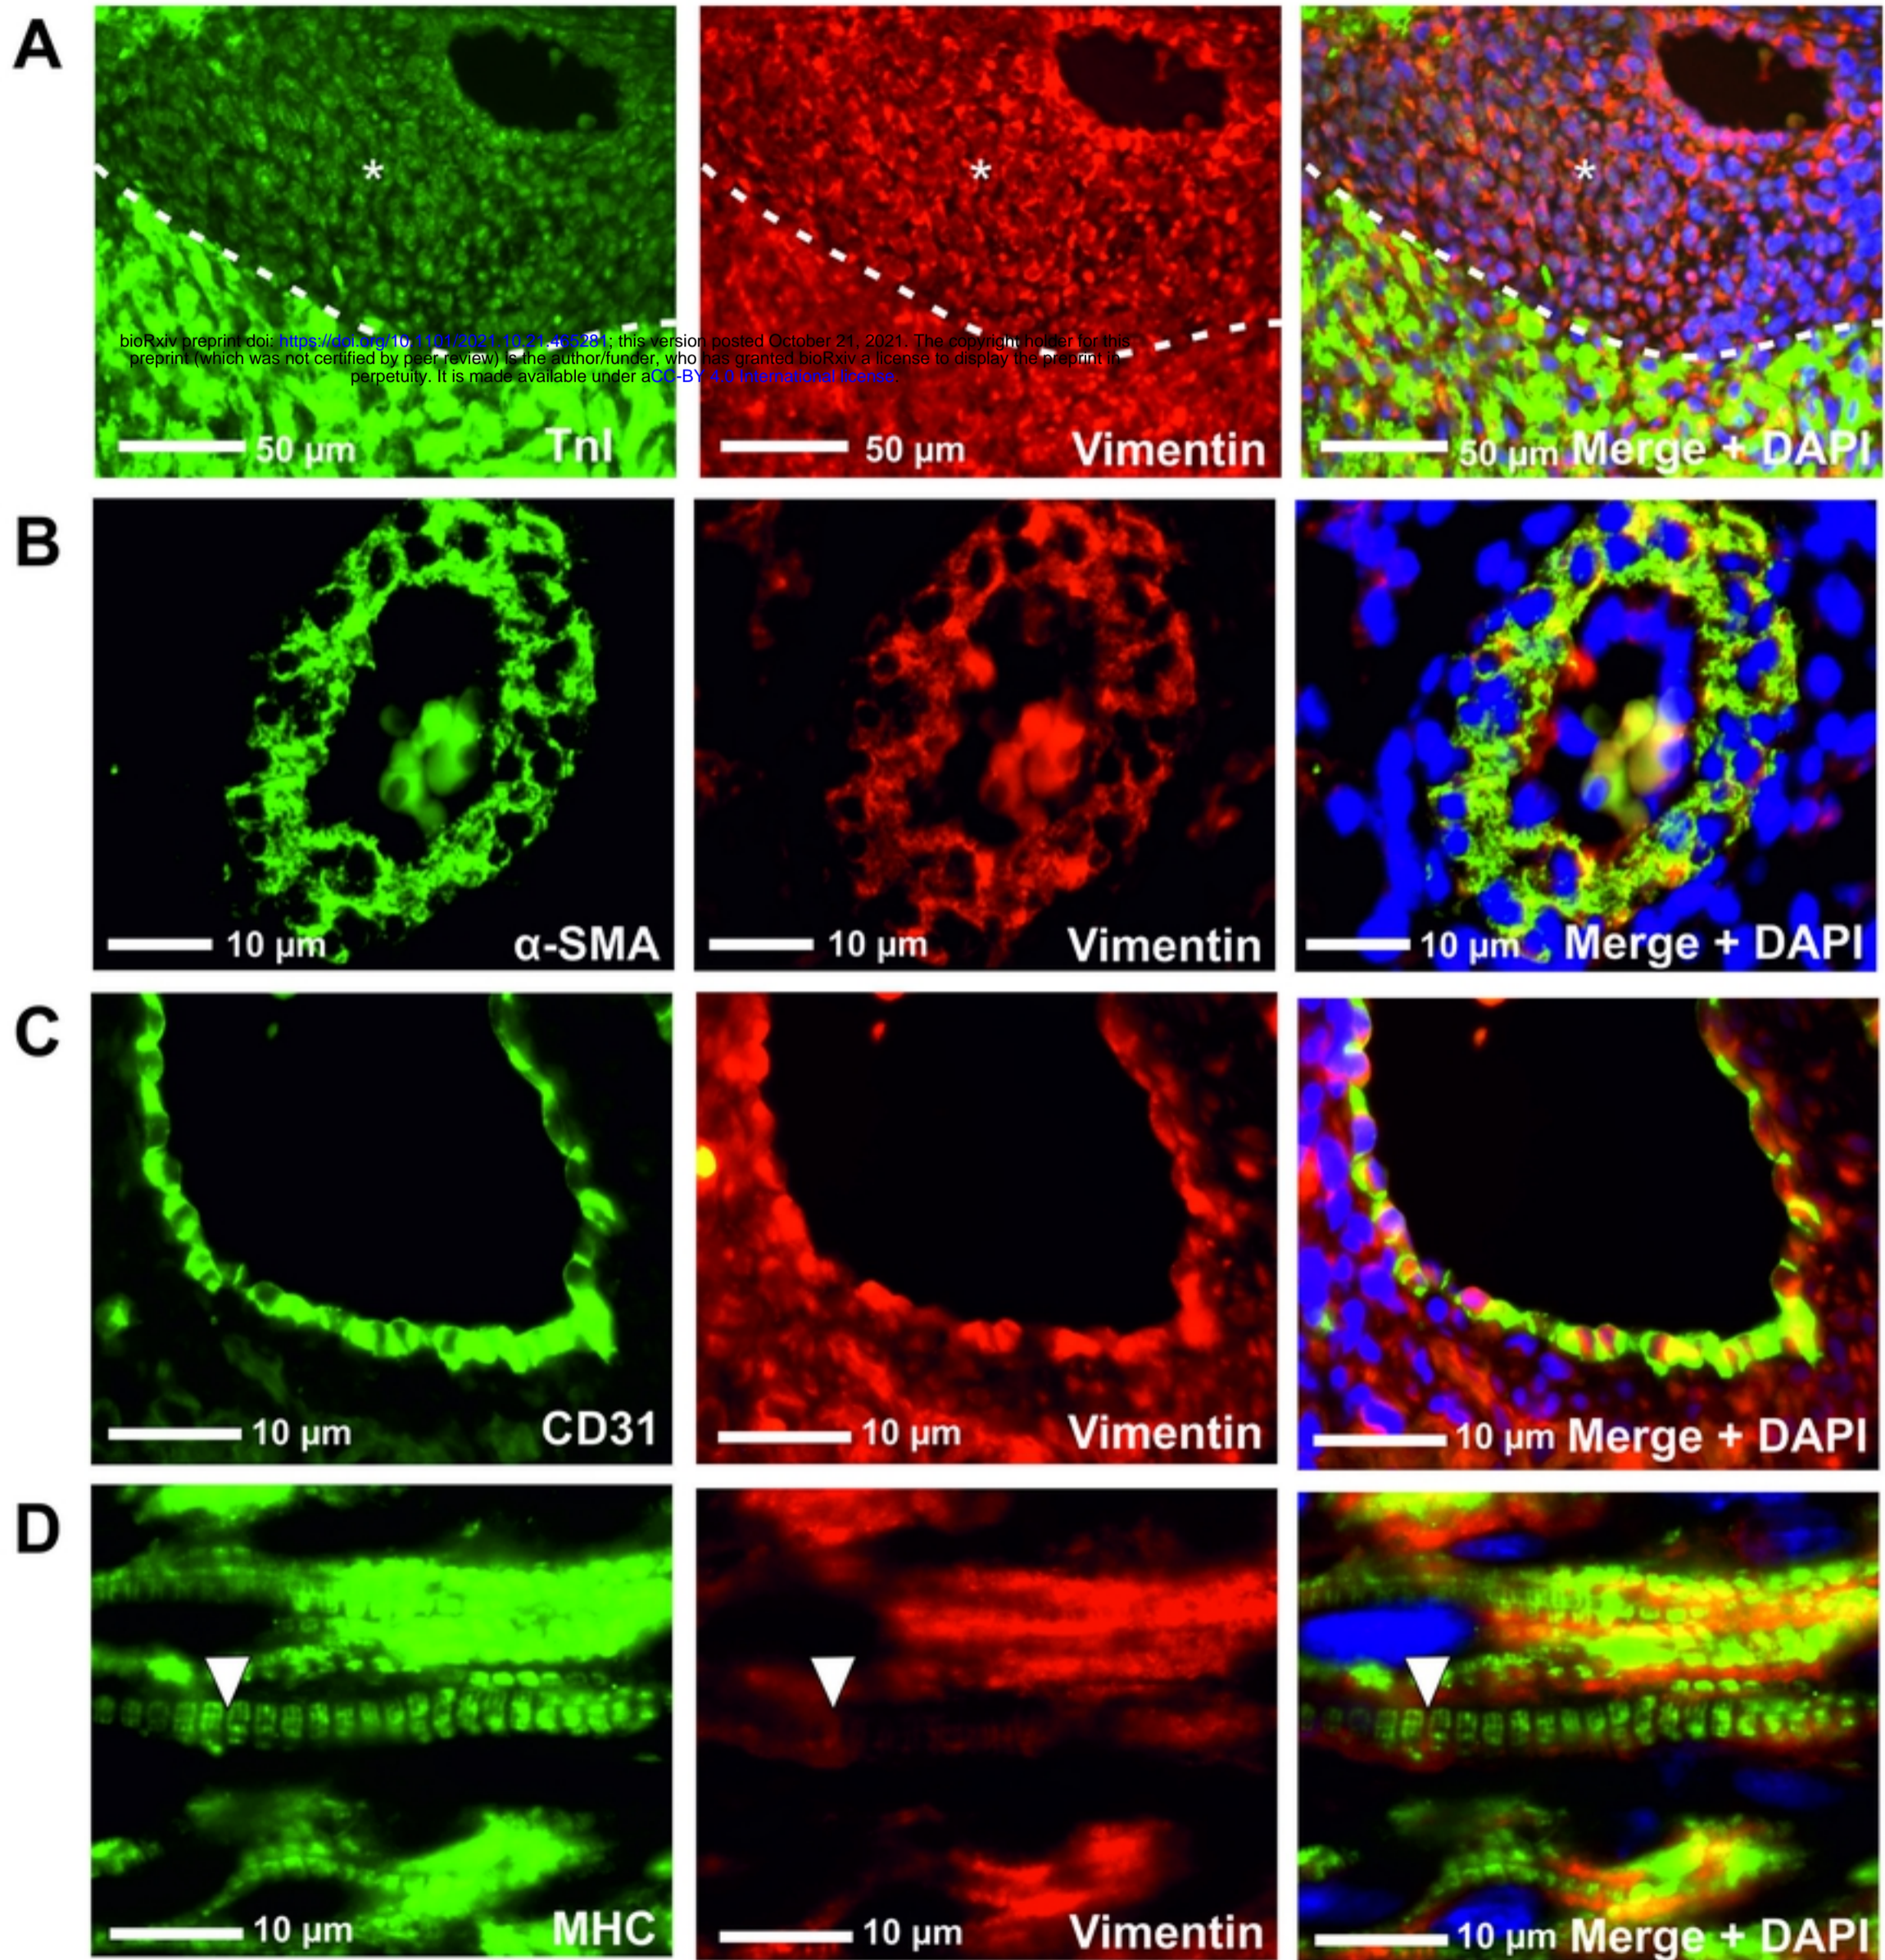

Figure 5



# A Heart Tissue

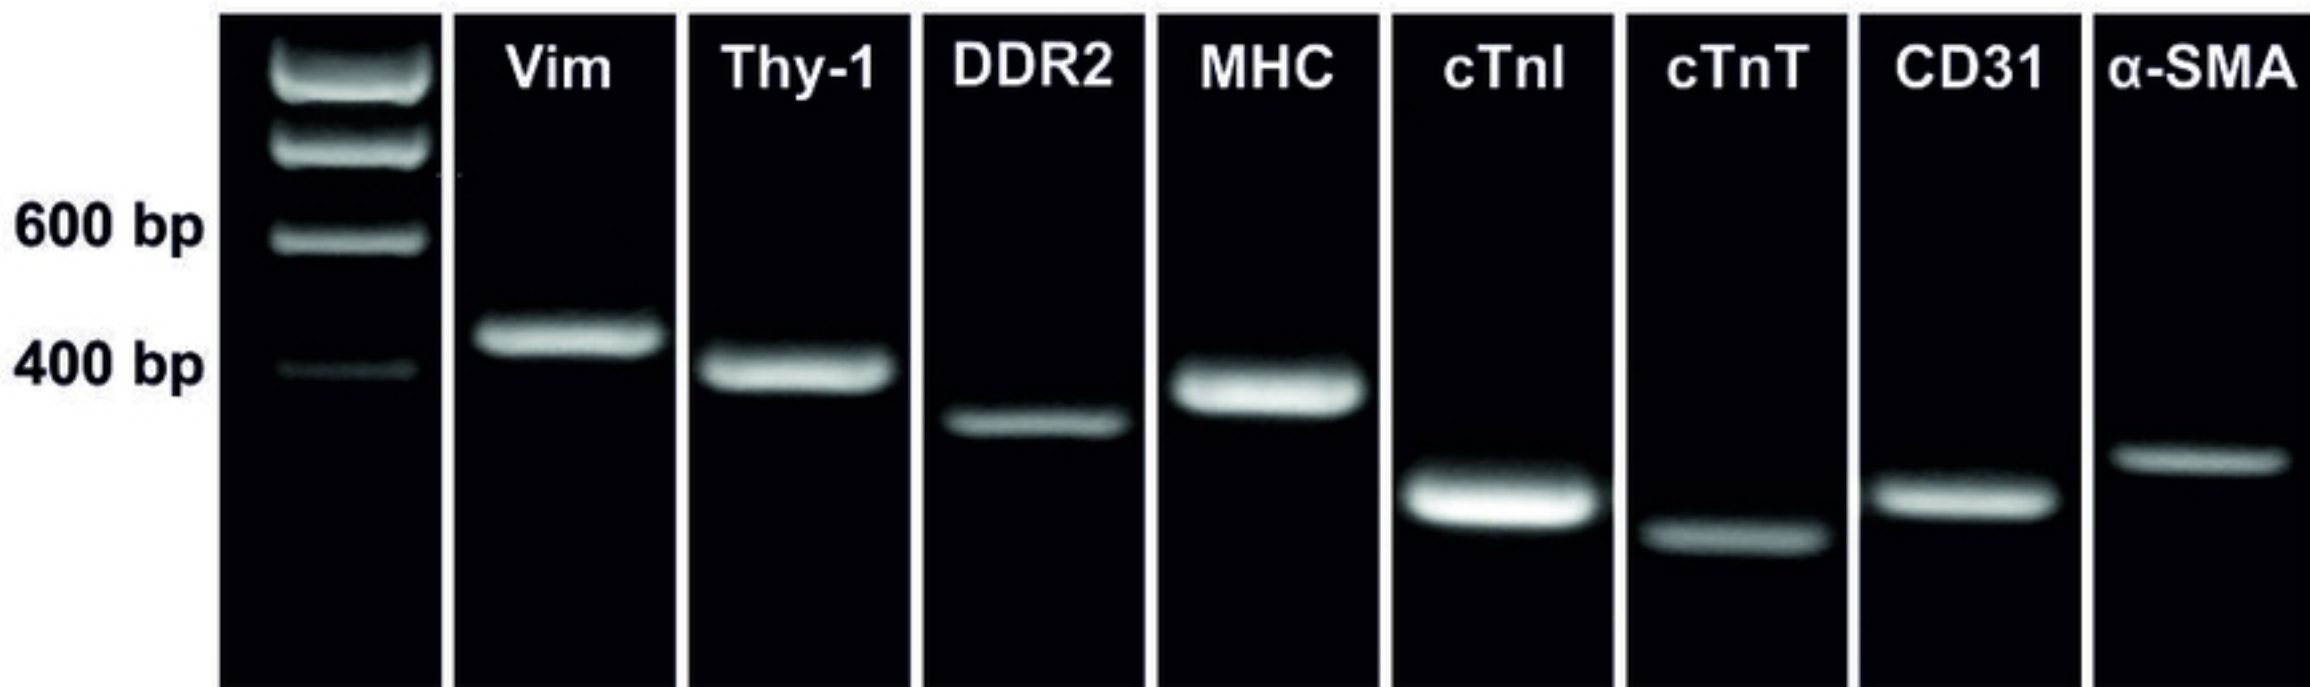

# B Ventricle Fibroblasts

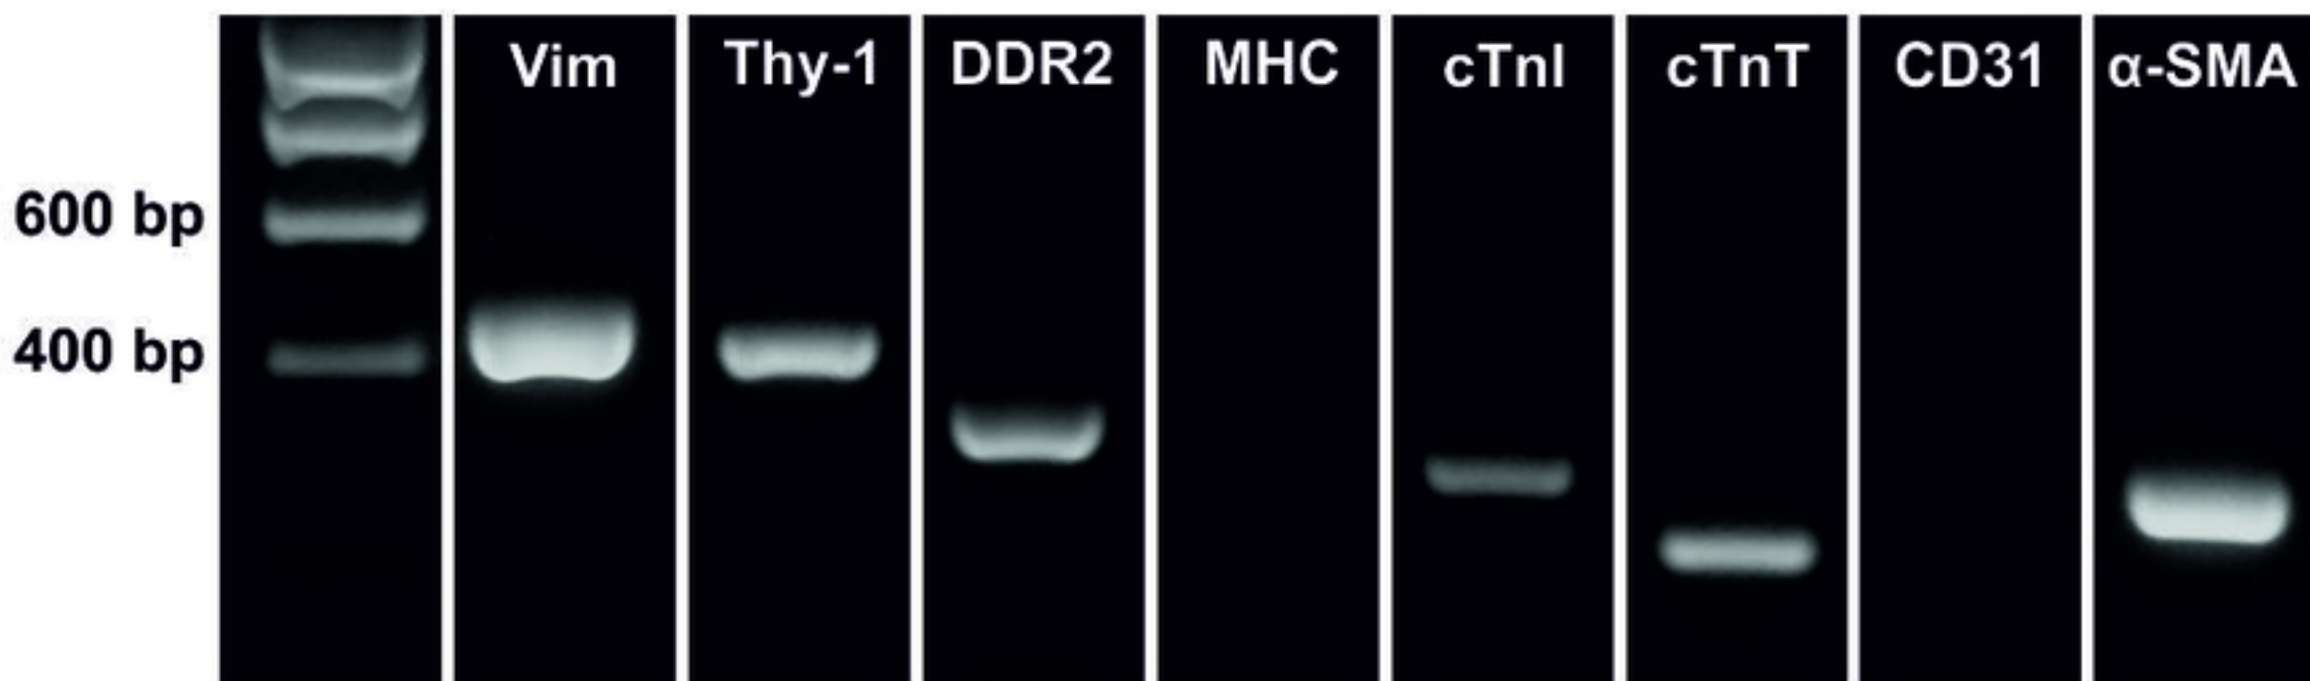

Figure 6

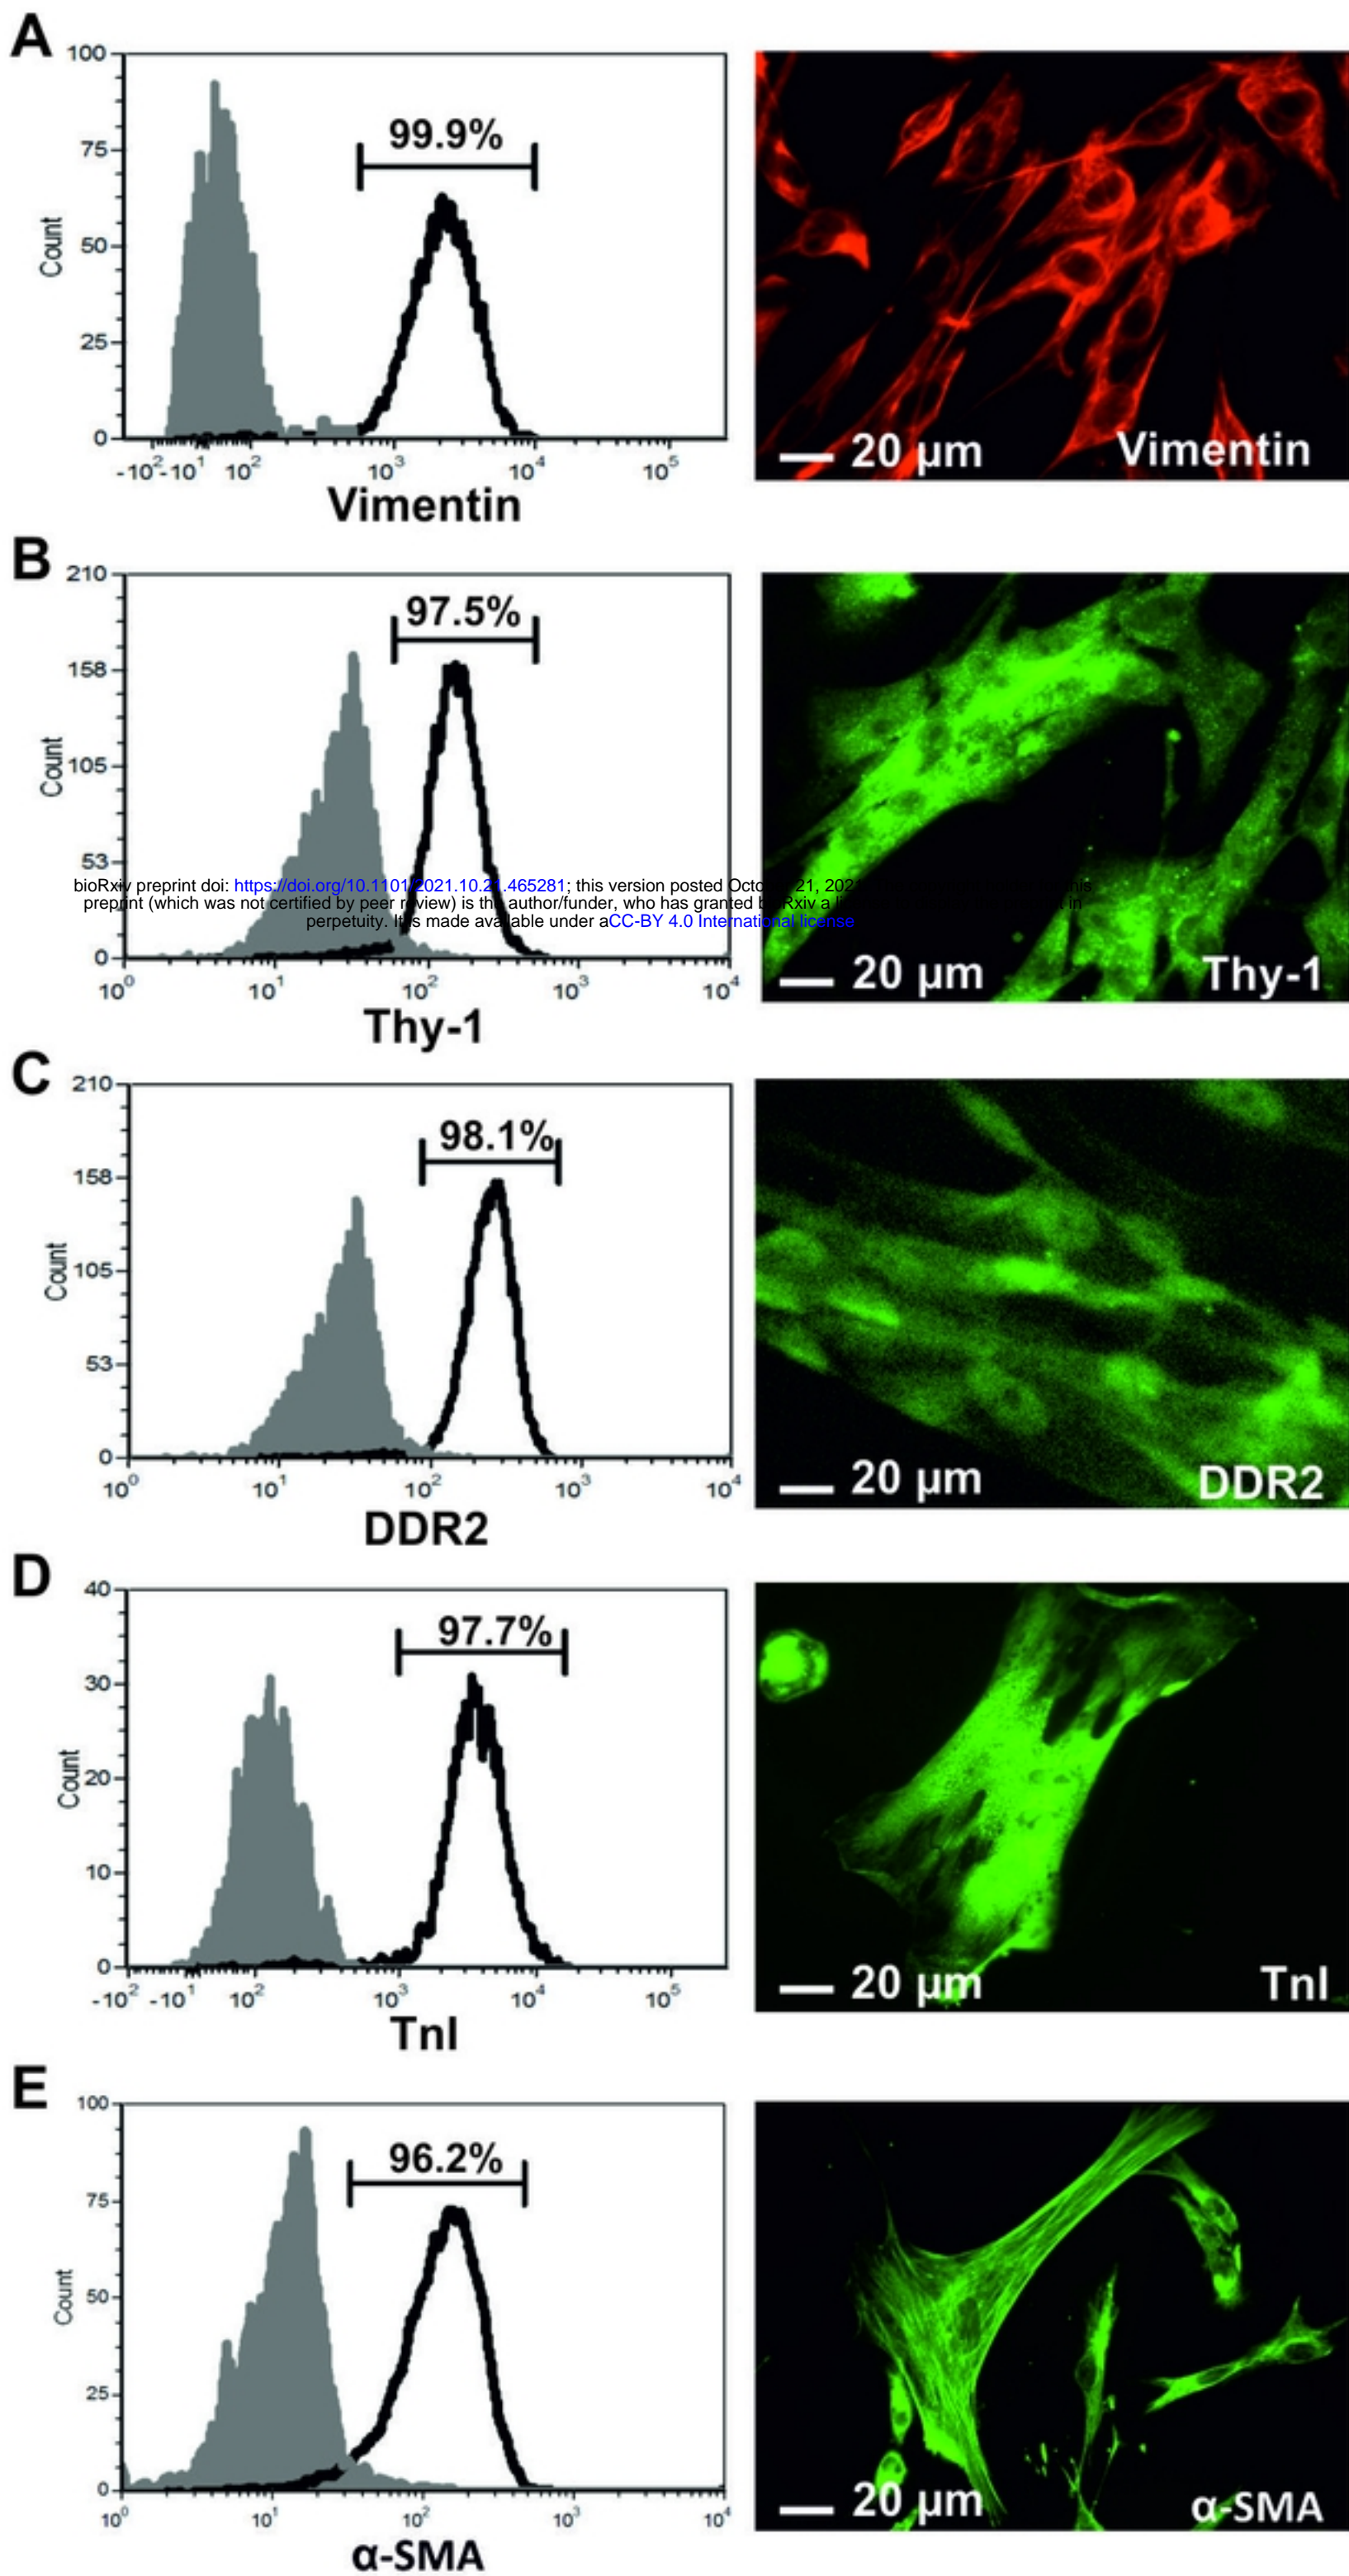

Figure 7



| <b>Gene</b>   | <b>Primer Sequence (5' to 3')</b>                      | <b>Product Size</b> |
|---------------|--------------------------------------------------------|---------------------|
| Vimentin      | F: GAGAACTTTGCCGTTGAAGC<br>R: TCTTGCGCTCCTGAAAAACT     | 469 bp              |
| Thy1          | F: ACCCGTGAGACAAAGAAGCA<br>R: CTCAAGGTTTGAGGGATTGG     | 427 bp              |
| DDR2          | F: TCCAGCTATATGCCGCTATC<br>R: CTATTTCCATCCAGCACCTG     | 357 bp              |
| $\alpha$ -MHC | F: GTCATTGCTGAAACCGAGAATG<br>R: GCAAAGTACTGGATGACACGCT | 413 bp              |
| Troponin I    | F: GCCTCGAGAAAATTGCAGCT<br>R: CCGCTTAAACTTGCCTCGAA     | 297 bp              |
| Troponin T    | F: ATGATGCATTTTGGGGGTTA<br>R: TGCTGCTTGAACCTTCTCCTG    | 221 bp              |
| CD31          | F: TGCAGTGGTTATCATCGGAGT<br>R: GACAGCTTTCCGGACTTCAC    | 349 bp              |
| $\alpha$ -SMA | F: CTGTTCCAGCCATCCTTCAT<br>R: TGATCCACATCTGCTGGAAG     | 292 bp              |

bioRxiv preprint doi: <https://doi.org/10.1101/2021.10.21.465281>; this version posted October 21, 2021. The copyright holder for this preprint (which was not certified by peer review) is the author/funder, who has granted bioRxiv a license to display the preprint in perpetuity. It is made available under aCC-BY 4.0 International license.

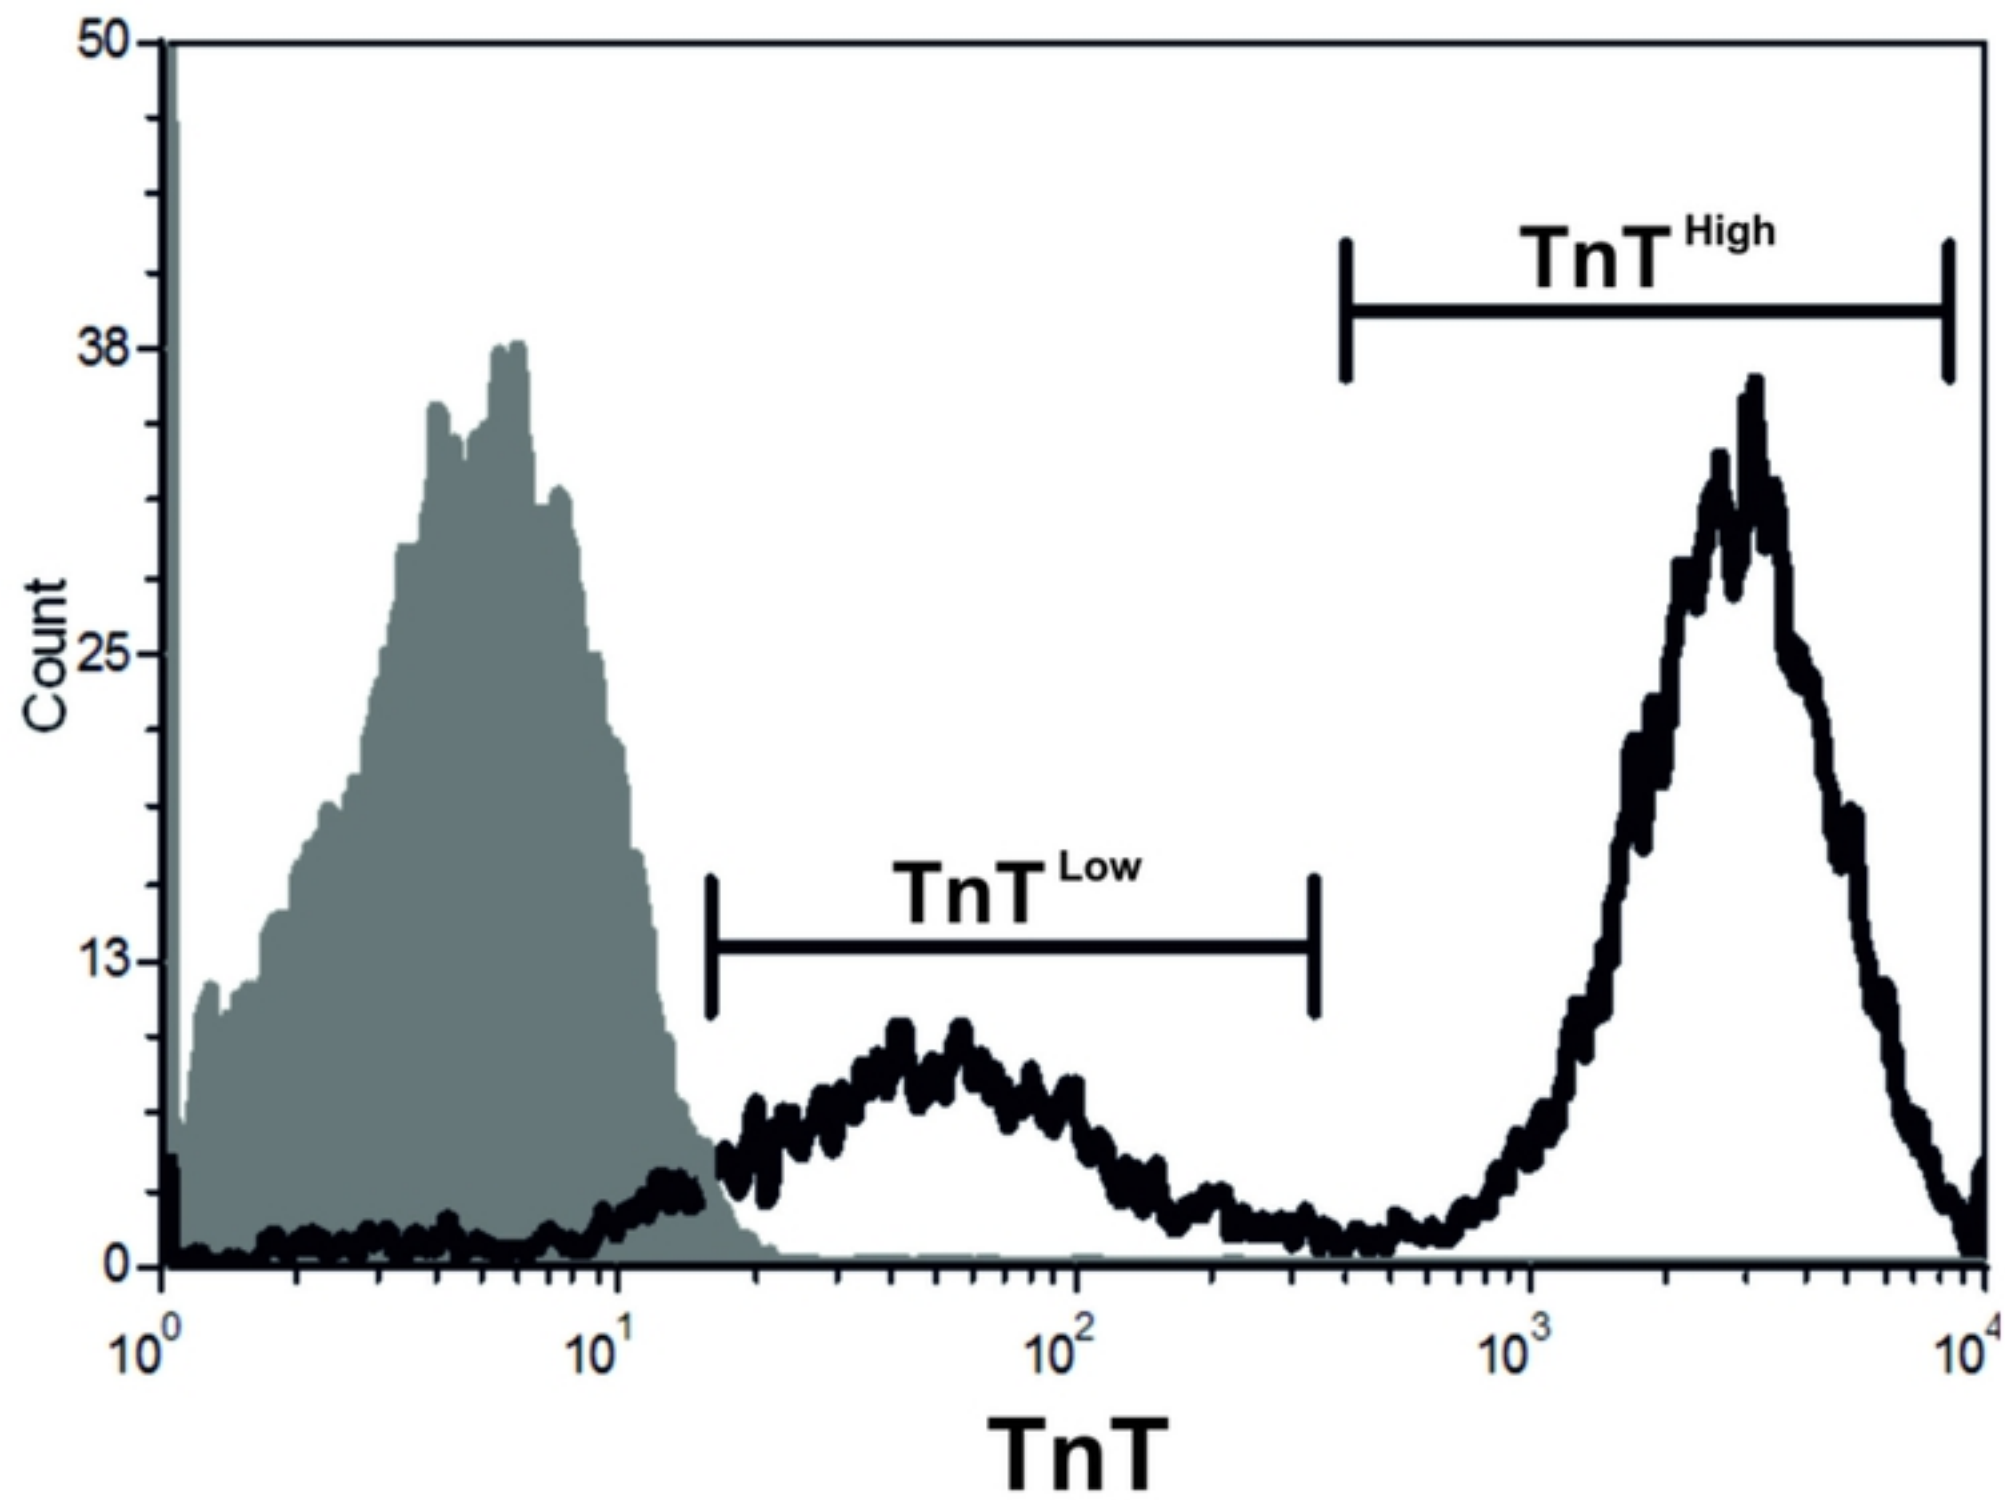

Supplementary Figure 1

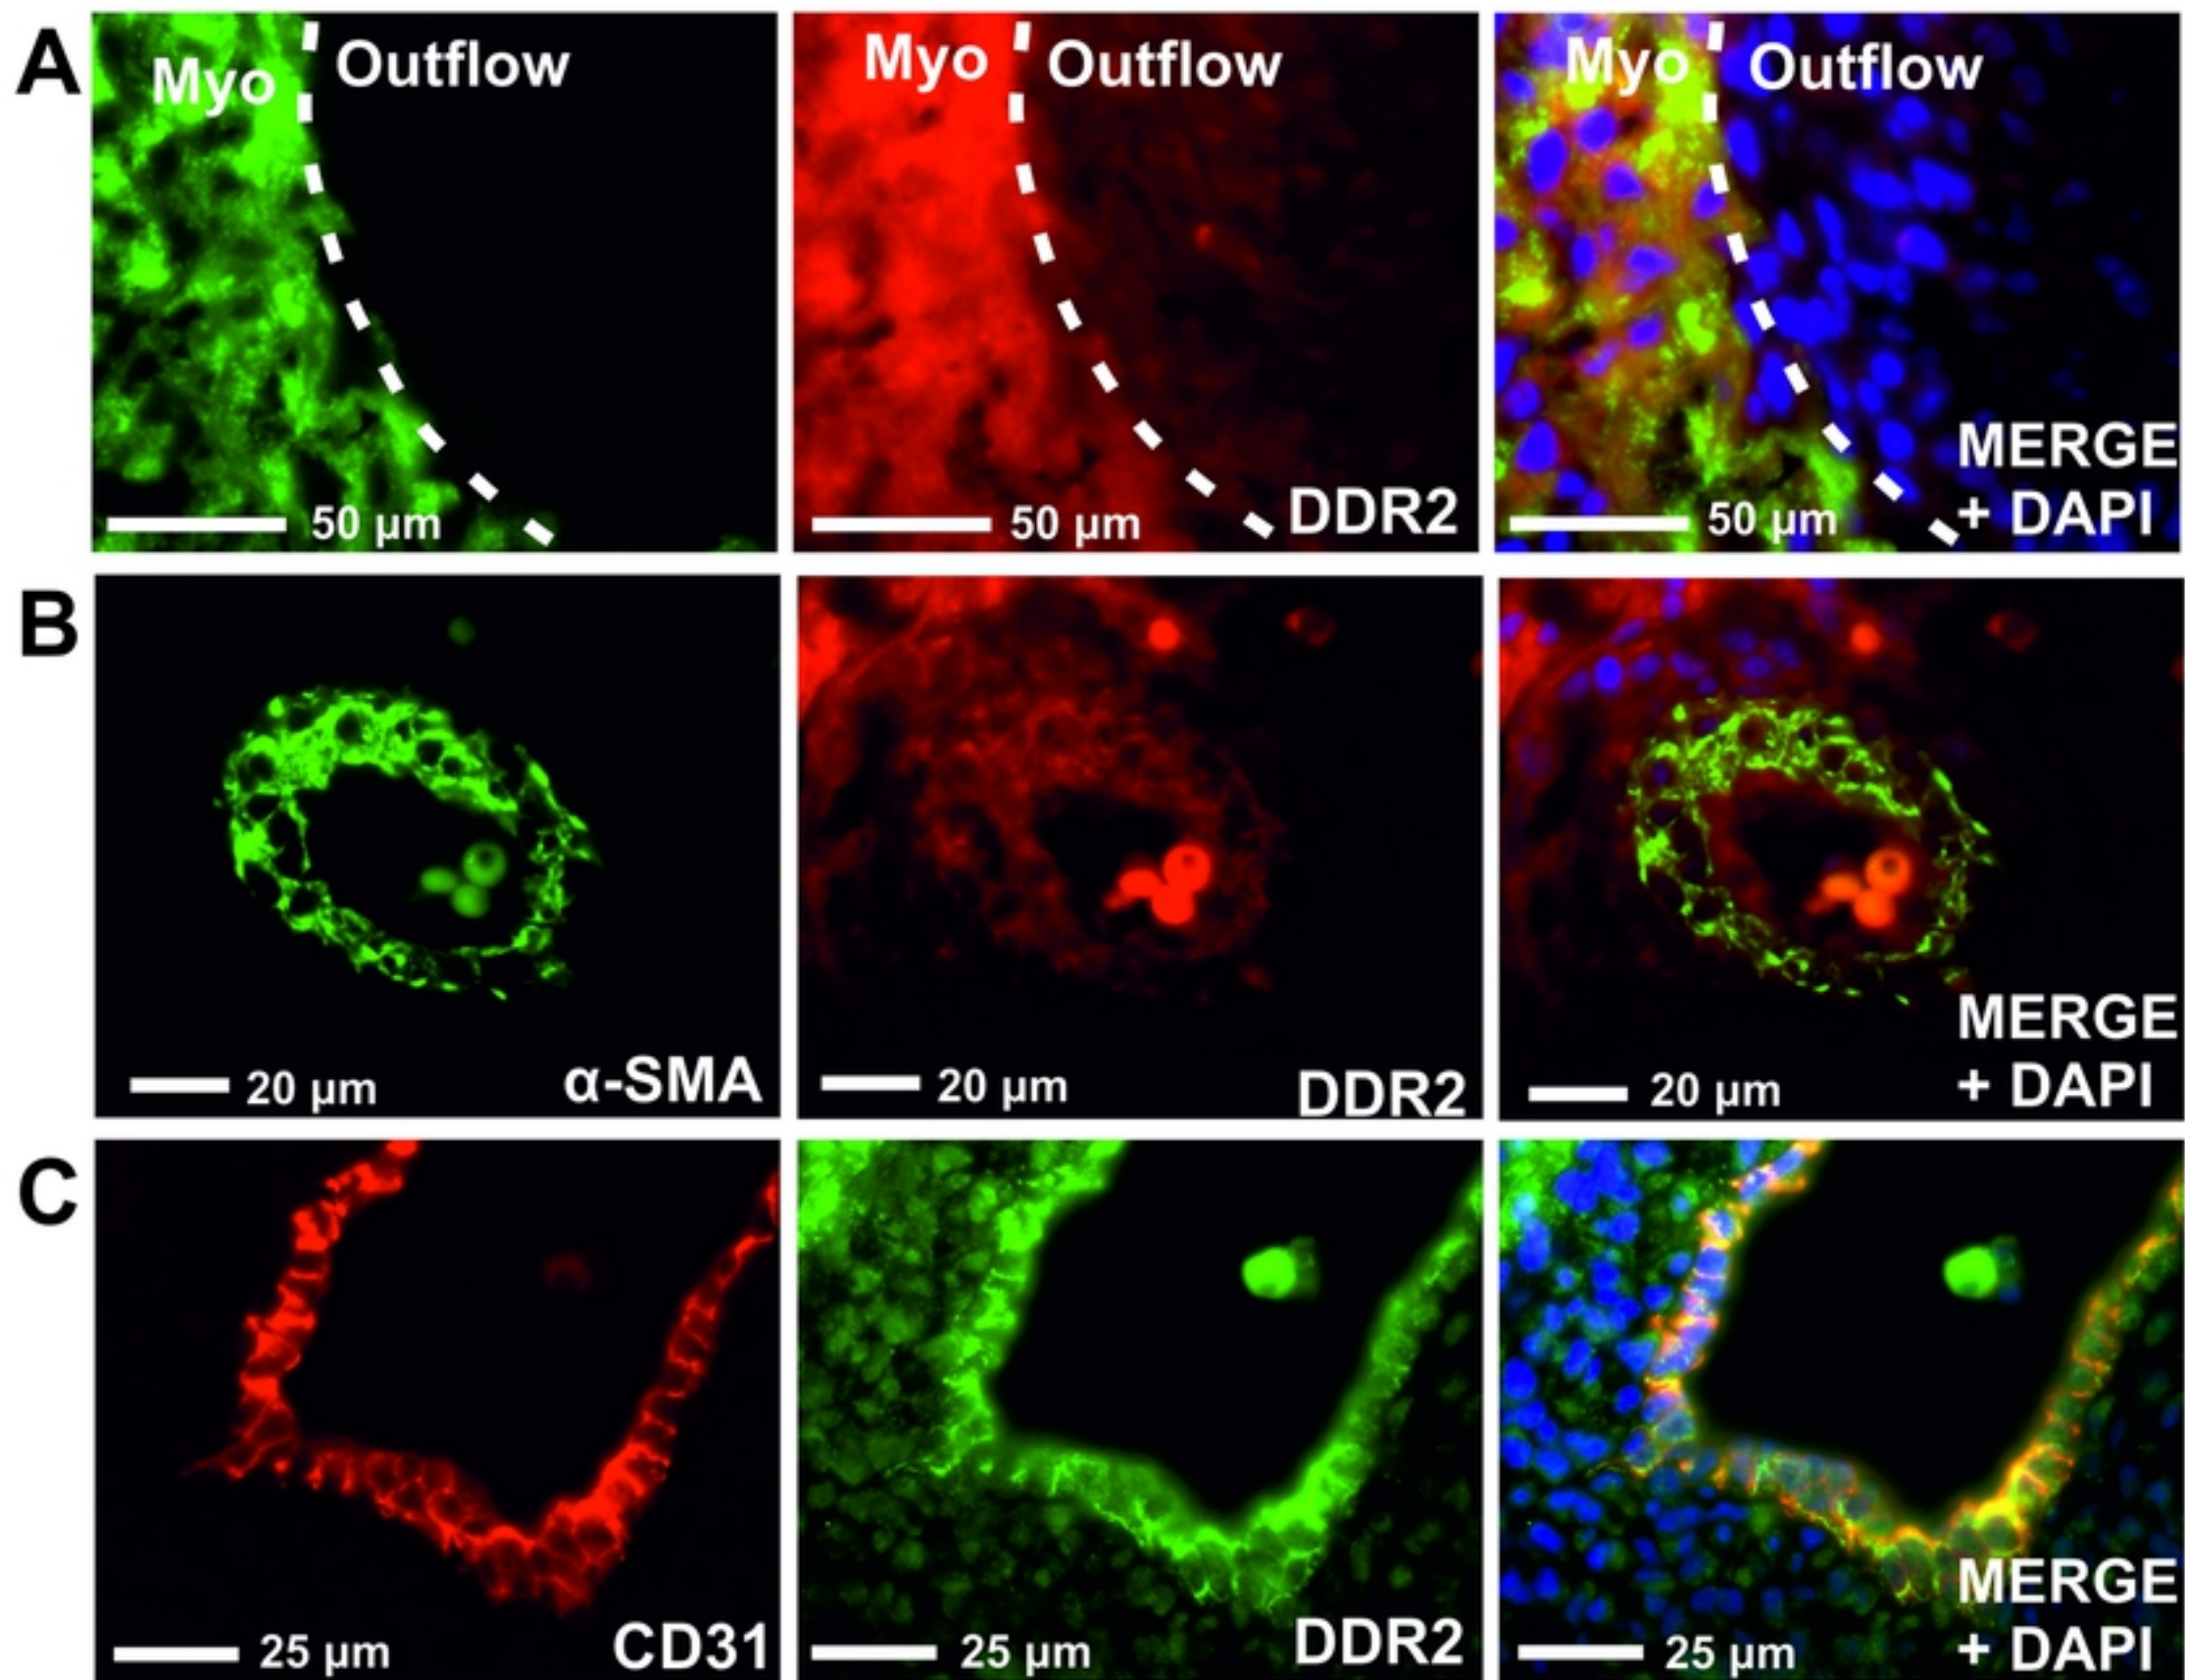

Supplementary Figure 2
